# Supplementary material for: Deep sequencing of transcriptome profiling of GSTM2 knock-down in swine testis cells
Source: PubMed Central journal article supplement (PMC5131268; doi:10.1038/srep38254), 2016-12-01
Supplement: srep38254-s1.pdf [file srep38254-s1.pdf]

# Deep sequencing of transcriptome profiling of *GSTM2* knock-down in swine testis cells

Yuqi Lv<sup>1,+</sup>, Yi Jin<sup>1,+</sup>, Yongqiang Zhou<sup>1</sup>, Jianjun Jin<sup>1</sup>, Zhenfa Ma<sup>1</sup>, Zhuqing Ren<sup>1,2,\*</sup>

<sup>1</sup>Key Laboratory of Swine Genetics and Breeding of Ministry of Agriculture & Key Laboratory of Agriculture Animal Genetics, Breeding and Reproduction of Ministry of Education, College of Animal Science, Huazhong Agricultural University, Wuhan, Hubei, P.R.China, 430070

<sup>2</sup>The Cooperative Innovation Center for Sustainable Pig Production, Huazhong Agricultural University, Wuhan, Hubei, P.R.China, 430070

\*Corresponding author: [renzq@mail.hzau.edu.cn](mailto:renzq@mail.hzau.edu.cn) (Zhuqing Ren)

+These authors contributed equally to this work

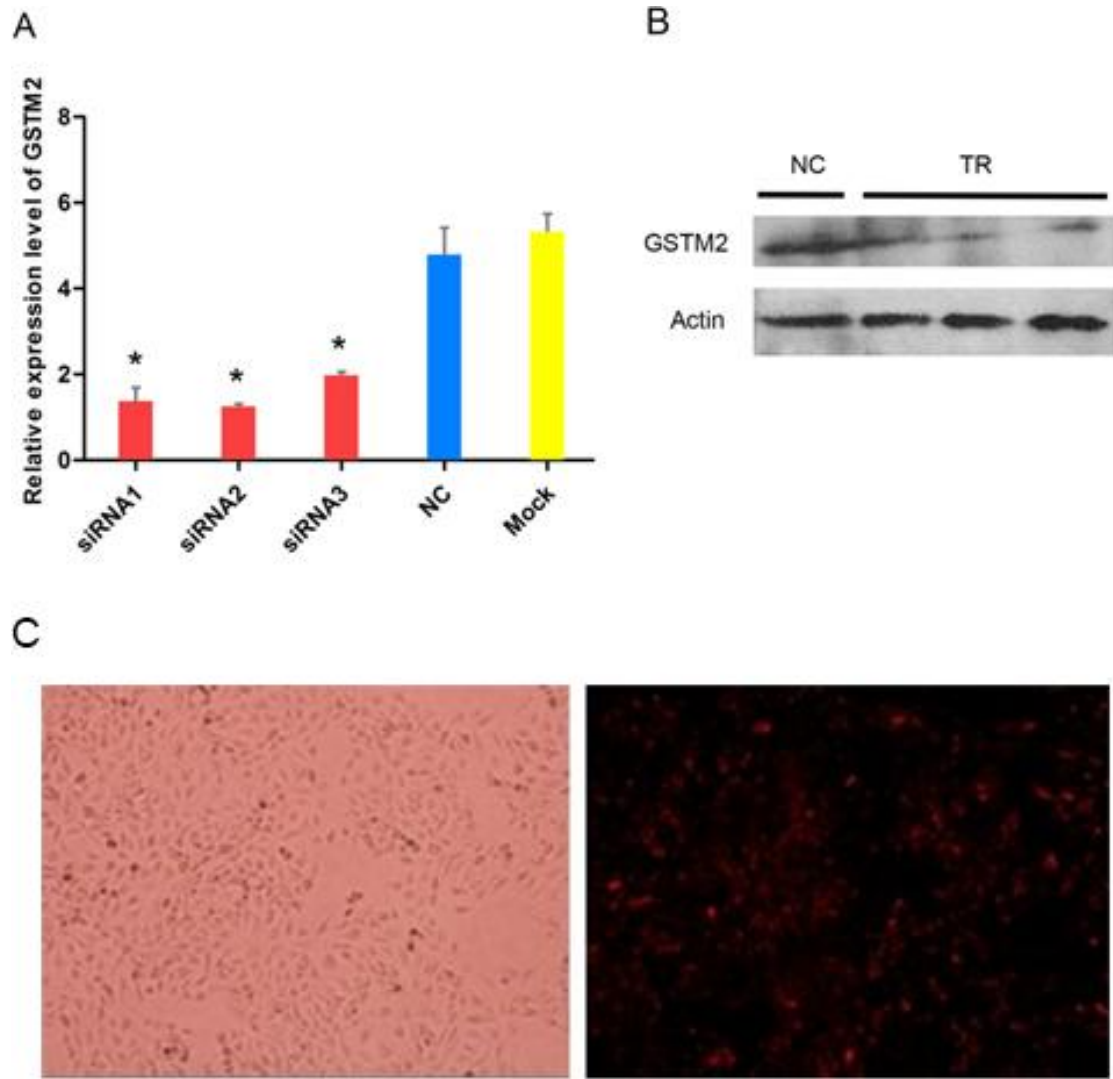

**Supplementary Figure S1. Knock down *GSTM2* in ST cells transfected with siRNAs. A** relative expression level of *GSTM2*. **B.** expression level of *GSTM2* by western blot analysis. **C.** detection of efficiency of siRNA transfection by fluorescence microscope.  $\beta$ -actin was used as the negative control. \*  $P < 0.05$ , \*\*  $P < 0.01$ .

A

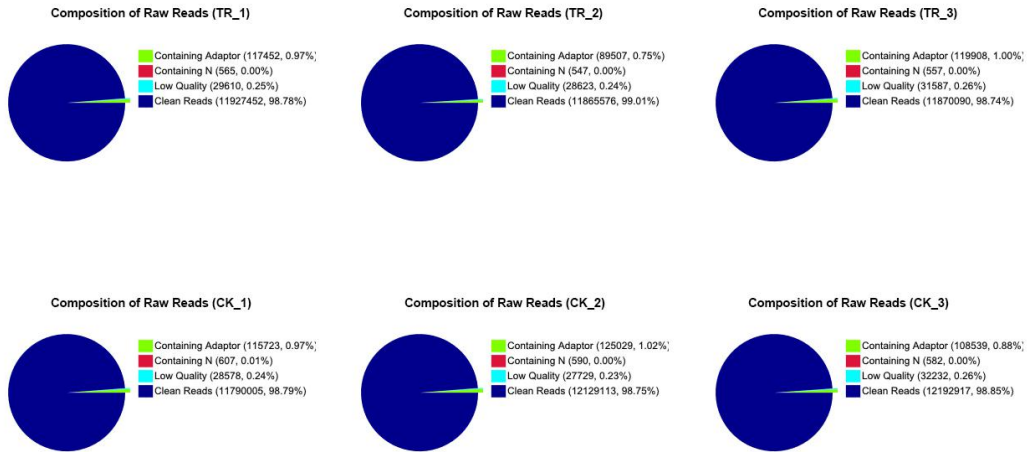

B

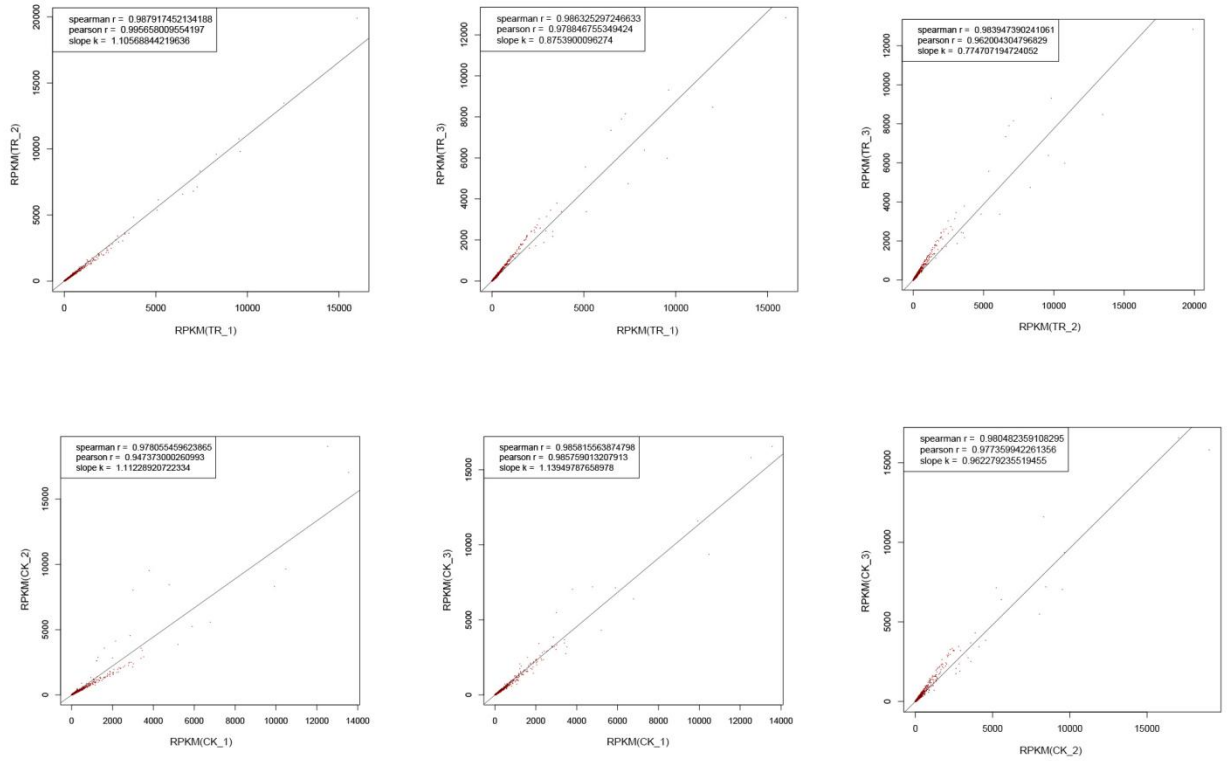

# C

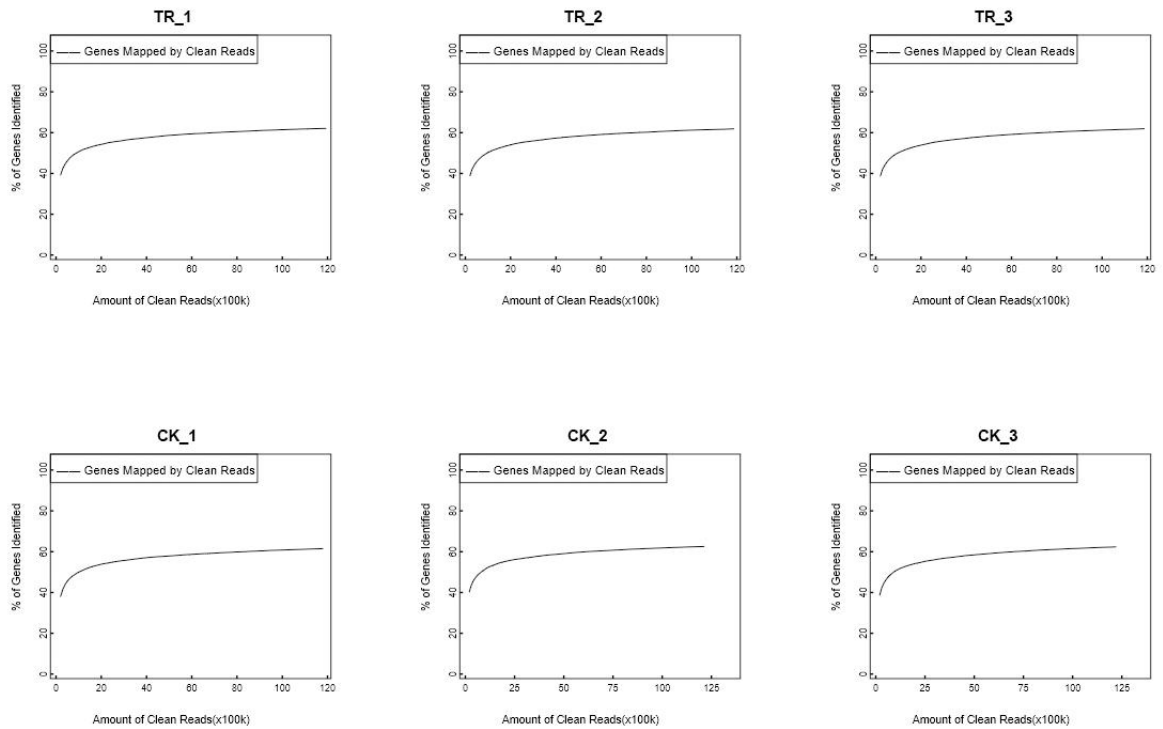

**Supplementary Figure S2. Sequence quality and saturation analysis.** A Total tag pie chart and distinct tag pie chart. The first row represents treatment group and the second row represents control group. The sample RNA preparation and experiments were thought to be convincing if the tags contains N were less than 10% of total raw data, and copy number less than 2 tags was no more than 20%. The data showed that all the samples conformed to sequencing requirement and the experiments were successful. B repeatability of RNA-seq. R values both from Spearman and Pearson analyses over 8 showed a high repeatability between two samples. C The saturation analysis. Sequence saturation analysis is used to measure the sequencing data of a sample. With the number of reads increasing, the number of detected genes is increasing. However, when the number of reads reaches a certain amount, the growth curve of detected genes flattens, which indicates that the number of detected genes tends to saturation.

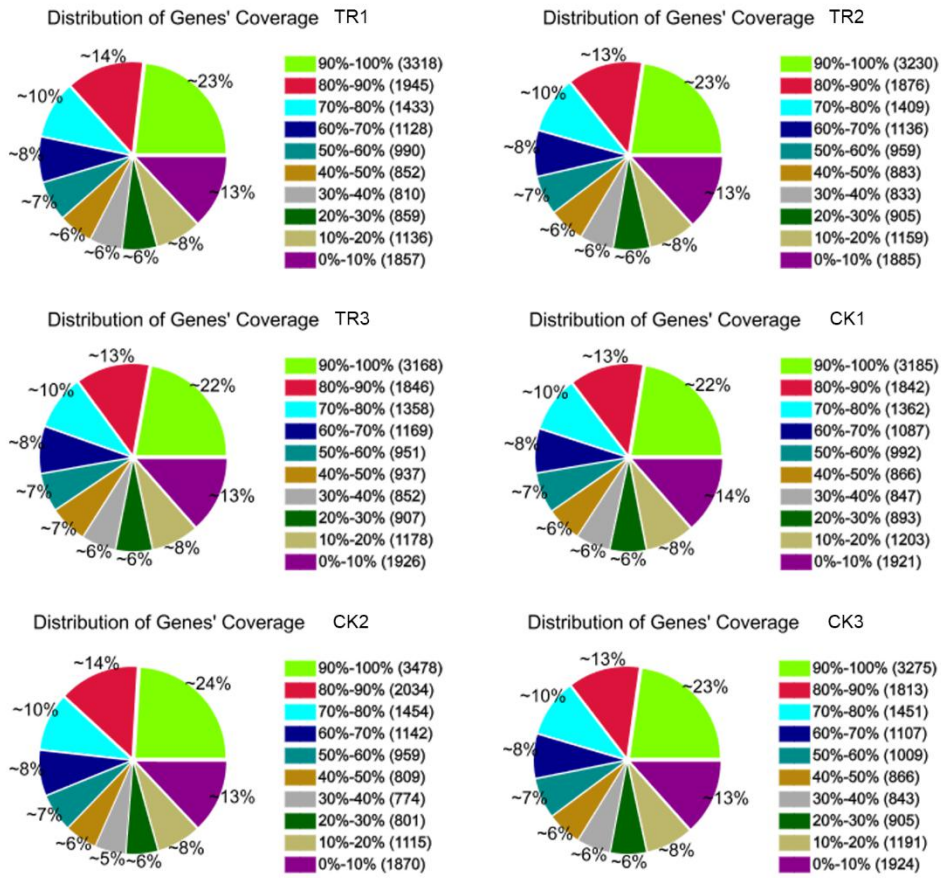

**Supplementary Figure S3. Distribution of read coverage in transcripts investigated. (a) TR1. (b)TR2. (c) TR3. (d) CK1. (e) CK2. (f) CK3.**

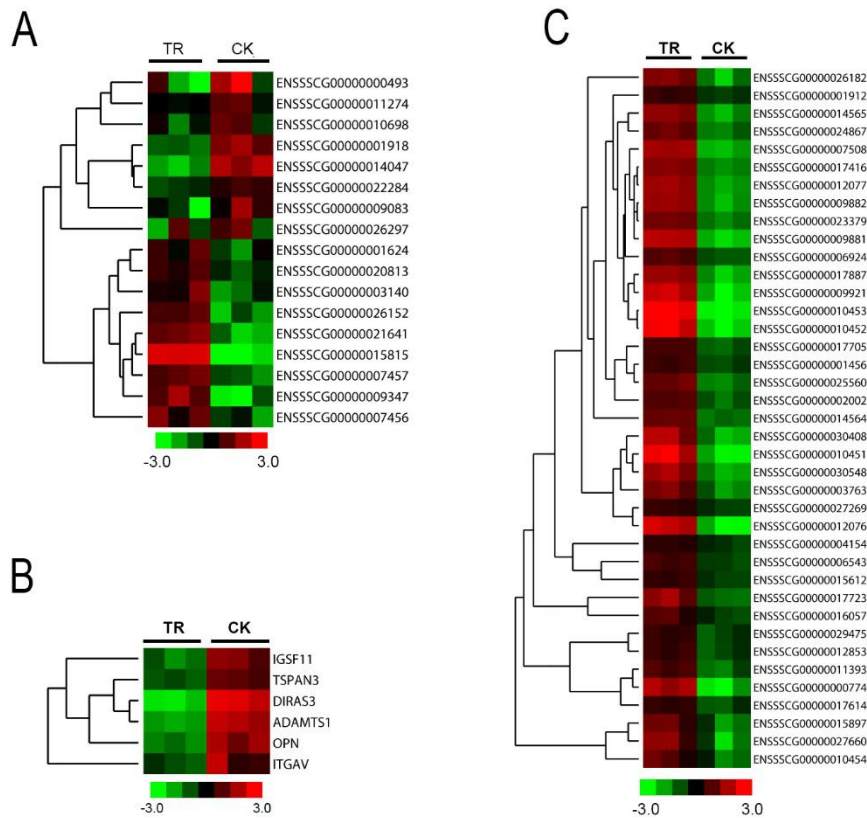

**Supplementary Figure S4. Genes involved in the Maternal-Placental Interface and embryonic development.** Each column indicates treatment groups (TR\_1, TR\_2, and TR\_3) and negative control group. And each row means a specific gene. Expression differences are shown in different colors which red indicates up-regulated and green means down-regulated. A indicates cluster analysis of differential gene expression pattern in fibroblast growth factor receptor (*FGFR*) family. B indicates cluster analysis of differential gene expression pattern in cell adhesion (interface) process. C indicates cluster analysis of differential gene expression pattern in IFN family.

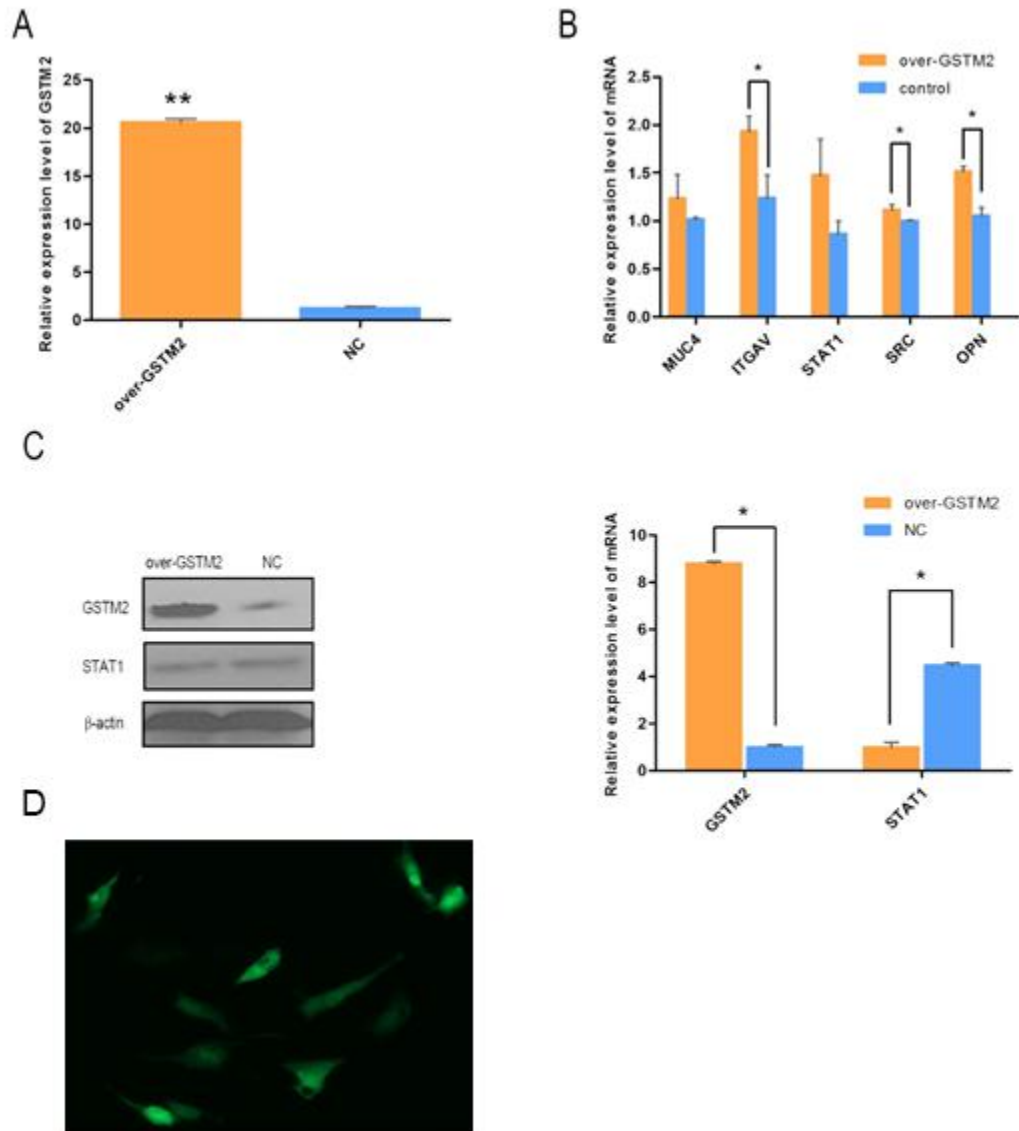

**Supplementary Figure S5. Overexpression experiment of GSTM2.** A *GSTM2* was overexpressed in ST cells and the mRNA expression level was detected after 48h. B downstream genes *MUC4*, *ITGAV*, *STAT1*, *SRC*, *OPN* mRNA expression level was tested after overexpressed *GSTM2* using q-PCR. C protein expression level of *GSTM2* and *STAT1* was investigated using western blot. The right pattern is the quantification of western blot of left pattern. D detection of transfection efficiency in ST cells by fluorescence microscope (40 $\times$ ).

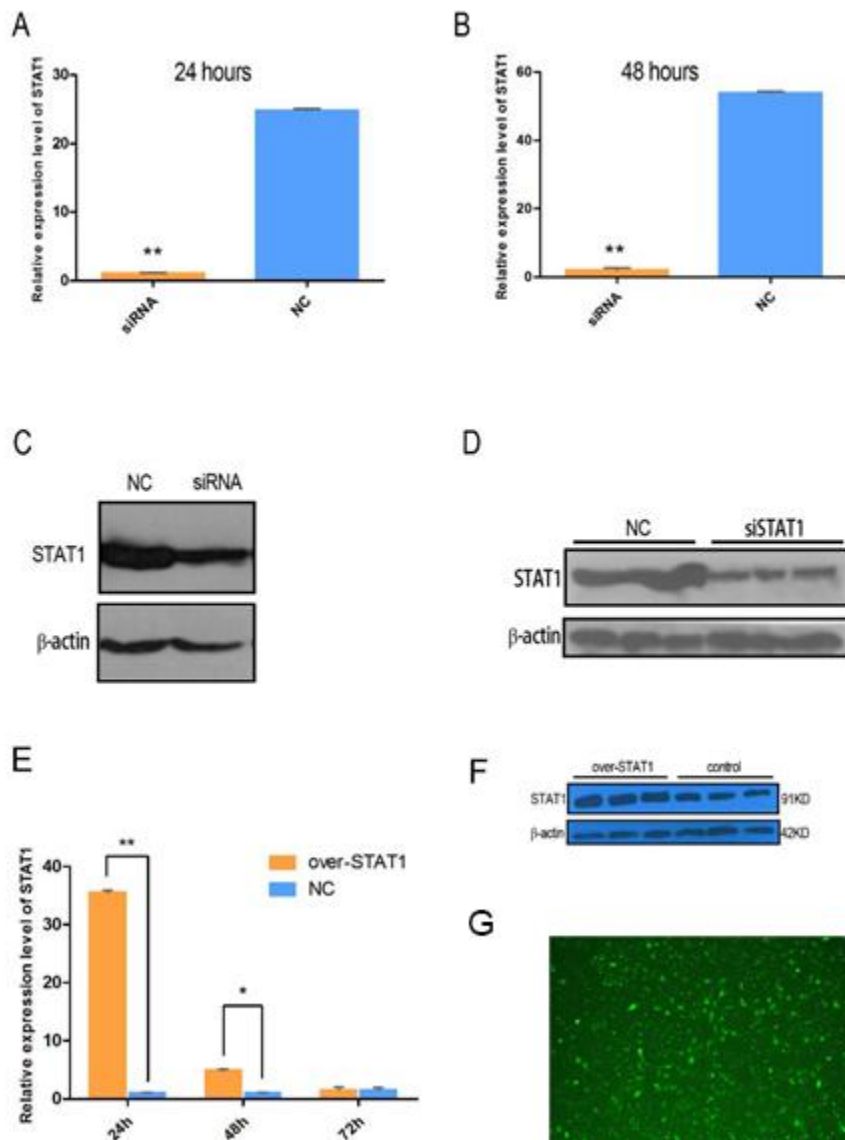

**Supplementary Figure S6. Overexpression and interference experiment for *STAT1*.** A-D Knock down *STAT1* in ST cells transfected with siRNA. A. the detection of *STAT1* mRNA level at 24h after transfection. B. the detection of *STAT1* mRNA level at 48h after transfection. C the detection of *STAT1* protein level at 24h after transfection. D the detection of *STAT1* protein level at 48h after transfection. E-F. Overexpress *STAT1* in ST cells. The q-PCR and western blot were used to detect the mRNA and protein expression level in ST cells transfected with *STAT1* overexpression vector. E *STAT1* mRNA expression level was increased in ST cells transfected with *STAT1* overexpression vector. F *STAT1* protein expression level was increased in ST cells. G detection of transfection efficiency of siRNA.  $\beta$ -actin was used as the negative control. \*  $P < 0.05$ , \*\*  $P < 0.01$ .



**Supplementary Table S1.** Primers for real-time qPCR.

| <b>Gene symbol</b> | <b>Primer Sequence 5'-3'</b>                                                         | <b>Product size (bp)</b> | <b>Accession</b> |
|--------------------|--------------------------------------------------------------------------------------|--------------------------|------------------|
| SPP1               | Forward: GAC AGC AGG GAC ACG GAC T<br>Reverse: TGC GGA ACT TCT TAG ATT TTG AC        | 220                      | NM_214023.1      |
| STAT1              | Forward: GGA ATG GAA GCG GAG ACA<br>Reverse: GGA AGA GGC TGA AGG TGC                 | 218                      | NM_213769.1      |
| ITGAV              | Forward: ATG GGT TTG AGG TCT TCG<br>Reverse: CTT GTC TAT GTC CGT GGC                 | 254                      | NM_001083932.1   |
| EEF1A1             | Forward: GTG AAA GCC ATC GCT AAA AG<br>Reverse: GTC CAA GAC CCA GGC ATA CT           | 213                      | NM_001097418.2   |
| CYR61              | Forward: AGG ACG GTG CCA AGG AC<br>Reverse: CGA GCA GAG GAG GGG TGT                  | 186                      | XM_001927740.3   |
| ADAMTS1            | Forward: CAA AAG CAG CAC AAC CCG<br>Reverse: CAT CCG CCA TCC CAA GAG                 | 118                      | NM_001144843.1   |
| TIMP3              | Forward: CGT GTC TAT GAT GGC AAG ATG TA<br>Reverse: AAG GCA GGT AGT AGC AGG ATT T    | 142                      | XM_003126073.4   |
| DUSP1              | Forward: ACA ACC ACA AGG CGG ACA TC<br>Reverse: TGC TCC TCC TCT GCT TCA CA           | 201                      | NM_001256075.1   |
| MMP19              | Forward: GCT GCC AGT GTC AGG TCA A<br>Reverse: ATG CGG AAG GTC AGG TGC               | 143                      |                  |
| MUC4               | Forward: CAG TTT GTG AGA AGG ACG GT<br>Reverse: GAG GGG AGG GTT GGA GTA G            | 165                      | NM_001206344.1   |
| SRC                | Forward: GCA CTC ACT CAG CAC AGG ACA<br>Reverse: TCG TGG TTT CGC TTT CTC G           | 177                      |                  |
| IRG6               | Forward: GCT GAA GGA AGC GGG TAT G<br>Reverse: GTT GCT CAC GAT GCT GAC ACT           | 139                      | KC109004.1       |
| GAPDH              | Forward: CGT CCC TGA GAC ACG ATG G<br>Reverse: TTC TCC GCC TTG ACT GTG C             | 200                      | NM_001206359     |
| HSPCB              | Forward: CGC TAC CAT ACC TCC CAG TC<br>Reverse: ACC AGG CTC TTC CCA TCA AA           | 236                      |                  |
| ACTB               | Forward: AAG ATC AAG ATC ATC GCG CCT CCA<br>Reverse: ACT CCT GCT TGC TGA TCC ACA TCT | 109                      | XM_003124280     |

**Supplementary Table S2. Quality evaluation of transcriptome library.** (a) Statistics of transcriptome library in each sample. (b) The number of reads mapping to reference gene and reference genome from each sample.

| Sample | Raw reads  | Clean reads         |
|--------|------------|---------------------|
| TR1    | 12,075,079 | 11,927,452 (98.78%) |
| TR2    | 11,984,253 | 11,865,576 (99.01%) |
| TR3    | 12,022,142 | 11,870,090 (98.74%) |
| CK1    | 11,934,913 | 11,790,005 (98.79%) |
| CK2    | 12,282,461 | 12,129,113 (98.75%) |
| CK3    | 12,334,270 | 12,192,917 (98.85%) |

(a)

| Sample | Total reads | Total BasePairs | Map to Gene       |                   | Map to Genome     |                   |
|--------|-------------|-----------------|-------------------|-------------------|-------------------|-------------------|
|        |             |                 | Total mapped      | Unique mapped     | Total mapped      | Unique mapped     |
| TR1    | 11,927,452  | 584,445,148     | 7,766,274(65.11%) | 6,134,237(51.43%) | 8,876,534(74.42%) | 7,428,666(62.28%) |
| TR2    | 11,865,576  | 581,413,224     | 7,498,252(63.19%) | 5,930,876(49.98%) | 8,767,986(73.89%) | 7,308,617(61.60%) |
| TR3    | 11,870,090  | 581,634,410     | 7,702,473(64.89%) | 6,046,769(50.94%) | 8,749,773(73.71%) | 7,297,390(61.48%) |
| CK1    | 11,790,005  | 577,710,245     | 8,069,266(68.44%) | 6,415,439(54.41%) | 8,930,091(75.74%) | 7,480,412(63.45%) |
| CK2    | 12,129,113  | 594,326,537     | 8,188,041(67.51%) | 6,562,121(54.10%) | 9,281,992(76.53%) | 7,815,559(64.44%) |
| CK3    | 12,192,917  | 597,452,93      | 8,301,723(68.09%) | 6,605,101(54.17%) | 9,237,580(75.76%) | 7,753,997(63.59%) |

(b)

**Supplementary Table S3. The reads mapping to reference gene and reference genome from TR and CK groups. (a) TR1. (b) TR2. (c) TR3. (d) CK1. (e) CK2. (f) CK3.**

| TR1                  | Map to gene  |            | Map to genome |            |
|----------------------|--------------|------------|---------------|------------|
|                      | Reads number | percentage | Reads number  | percentage |
| Total Reads          | 11927452     | 100.00%    | 11927452      | 100.00%    |
| Total BasePairs      | 584445148    | 100.00%    | 584445148     | 100.00%    |
| Total Mapped Reads   | 7766274      | 65.11%     | 8876534       | 74.42%     |
| perfect match        | 6433722      | 53.94%     | 7003970       | 58.72%     |
| <=2bp mismatch       | 1332552      | 11.17%     | 1872564       | 15.70%     |
| unique match         | 6134237      | 51.43%     | 7428666       | 62.28%     |
| multi-position match | 1632037      | 13.68%     | 1447868       | 12.14%     |
| Total Unmapped Reads | 4161178      | 34.89%     | 3050918       | 25.58%     |

(a)

| TR2                  | Map to gene  |            | Map to genome |            |
|----------------------|--------------|------------|---------------|------------|
|                      | Reads number | percentage | Reads number  | percentage |
| Total Reads          | 11865576     | 100.00%    | 11865576      | 100.00%    |
| Total BasePairs      | 581413224    | 100.00%    | 581413224     | 100.00%    |
| Total Mapped Reads   | 7498252      | 63.19%     | 8767986       | 73.89%     |
| perfect match        | 6214289      | 52.37%     | 6924523       | 58.36%     |
| <=2bp mismatch       | 1283963      | 10.82%     | 1843463       | 15.54%     |
| unique match         | 5930876      | 49.98%     | 7308617       | 61.60%     |
| multi-position match | 1567376      | 13.21%     | 1459369       | 12.30%     |
| Total Unmapped Reads | 4367324      | 36.81%     | 3097590       | 26.11%     |

(b)

| TR3                  | Map to gene  |            | Map to genome |            |
|----------------------|--------------|------------|---------------|------------|
|                      | Reads number | percentage | Reads number  | percentage |
| Total Reads          | 11870090     | 100.00%    | 11870090      | 100.00%    |
| Total BasePairs      | 581634410    | 100.00%    | 581634410     | 100.00%    |
| Total Mapped Reads   | 7702473      | 64.89%     | 8749773       | 73.71%     |
| perfect match        | 6355147      | 53.54%     | 6866078       | 57.84%     |
| <=2bp mismatch       | 1347326      | 11.35%     | 1883695       | 15.87%     |
| unique match         | 6046769      | 50.94%     | 7297390       | 61.48%     |
| multi-position match | 1655704      | 13.95%     | 1452383       | 12.24%     |
| Total Unmapped Reads | 4167617      | 35.11%     | 3120317       | 26.29%     |

(c)

| CK1             | Map to gene  |            | Map to genome |            |
|-----------------|--------------|------------|---------------|------------|
|                 | Reads number | percentage | Reads number  | percentage |
| Total Reads     | 11790005     | 100.00%    | 11790005      | 100.00%    |
| Total BasePairs | 577710245    | 100.00%    | 577710245     | 100.00%    |

|                      |         |        |         |        |
|----------------------|---------|--------|---------|--------|
| Total Mapped Reads   | 8069266 | 68.44% | 8930091 | 75.74% |
| perfect match        | 6713511 | 56.94% | 7030307 | 59.63% |
| <=2bp mismatch       | 1355755 | 11.50% | 1899784 | 16.11% |
| unique match         | 6415439 | 54.41% | 7480412 | 63.45% |
| multi-position match | 1653827 | 14.03% | 1449679 | 12.30% |
| Total Unmapped Reads | 3720739 | 31.56% | 2859914 | 24.26% |

(d)

| CK2                  | Map to gene  |            | Map to genome |            |
|----------------------|--------------|------------|---------------|------------|
|                      | Reads number | percentage | Reads number  | percentage |
| Total Reads          | 12129113     | 100.00%    | 12129113      | 100.00%    |
| Total BasePairs      | 594326537    | 100.00%    | 594326537     | 100.00%    |
| Total Mapped Reads   | 8188041      | 67.51%     | 9281992       | 76.53%     |
| perfect match        | 6860359      | 56.56%     | 7380066       | 60.85%     |
| <=2bp mismatch       | 1327682      | 10.95%     | 1901926       | 15.68%     |
| unique match         | 6562121      | 54.10%     | 7815559       | 64.44%     |
| multi-position match | 1625920      | 13.41%     | 1466433       | 12.09%     |
| Total Unmapped Reads | 3941072      | 32.49%     | 2847121       | 23.47%     |

(e)

| CK3                  | Map to gene  |            | Map to genome |            |
|----------------------|--------------|------------|---------------|------------|
|                      | Reads number | percentage | Reads number  | percentage |
| Total Reads          | 12192917     | 100.00%    | 12192917      | 100.00%    |
| Total BasePairs      | 597452933    | 100.00%    | 597452933     | 100.00%    |
| Total Mapped Reads   | 8301723      | 68.09%     | 9237580       | 75.76%     |
| perfect match        | 6894131      | 56.54%     | 7247842       | 59.44%     |
| <=2bp mismatch       | 1407592      | 11.54%     | 1989738       | 16.32%     |
| unique match         | 6605101      | 54.17%     | 7753997       | 63.59%     |
| multi-position match | 1696622      | 13.91%     | 1483583       | 12.17%     |
| Total Unmapped Reads | 3891194      | 31.91%     | 2955337       | 24.24%     |

(f)

**Supplementary Table S4. The differentially expressed genes in treatment groups compared to control groups.**

| <b>ENSEMBL_ID</b>   | <b>GENE_SYMBOL</b> | <b>GB_ACC</b> | <b>log2Ratio(TR/CK)</b> | <b>FDR</b> |
|---------------------|--------------------|---------------|-------------------------|------------|
| ENSSSCG00000010453  | IFIT1              | NM_001244363  | 6.361719332             | 0          |
| ENSSSCG00000008648  | IRG6               | NM_213817     | 5.647394281             | 0          |
| ENSSSCG00000010452  | IFIT3              | NM_001204395  | 5.557832768             | 0          |
| ENSSSCG00000010451  | IFIT2              | 5409          | 5.353464687             | 7.84E-45   |
| ENSSSCG00000012076  | MX2                | NP_001090885  | 5.170004159             | 0          |
| ENSSSCG00000009921  | OASL               | NM_001031790  | 4.775356695             | 0          |
| ENSSSCG00000000774  | USP18              | NM_213826     | 4.63895955              | 7.05E-46   |
| ENSSSCG00000004192  | CTGF               | NP_998998     | 4.637635534             | 1.90E-133  |
| ENSSSCG00000009720  | DDX60              | 25942         | 4.609178464             | 0          |
| ENSSSCG00000009881  | OAS2               | NM_001031796  | 4.502464045             | 0          |
| ENSSSCG000000021766 | novel              |               | 4.34866761              | 1.81E-34   |
| ENSSSCG000000027982 | ISG15              | NM_001128469  | 4.196848933             | 0          |
| ENSSSCG000000021712 | HERC6              | 26072         | 4.137676877             | 4.65E-195  |
| ENSSSCG00000007508  | ZBP1               | NM_001123216  | 3.993848525             | 3.01E-121  |
| ENSSSCG000000030408 | DDX58              | NM_213804     | 3.982813341             | 1.43E-134  |
| ENSSSCG00000017887  | XAF1               | 30932         | 3.817863407             | 4.57E-219  |
| ENSSSCG00000012077  | MX1                | NM_214061     | 3.660580296             | 5.77E-221  |
| ENSSSCG000000030548 | HERC5              | 24368         | 3.61425212              | 2.99E-196  |
| ENSSSCG00000009882  | OAS1               | F1RJN6        | 3.613993059             | 4.22E-102  |
| ENSSSCG00000008647  | CMPK2              | 27015         | 3.566528178             | 0          |
| ENSSSCG00000014565  | novel              | F1RGC4        | 3.478675612             | 3.84E-114  |

|                    |           |              |             |           |
|--------------------|-----------|--------------|-------------|-----------|
| ENSSSCG00000000148 | novel     | F1SPU1       | 3.415696751 | 2.15E-268 |
| ENSSSCG00000011936 | ZBED2     | 20710        | 3.302139681 | 0         |
| ENSSSCG00000027372 | SAMD9     | 1348         | 3.293354012 | 5.48E-249 |
| ENSSSCG00000006590 | S100A8    | NP_001153743 | 3.173914301 | 1.26E-188 |
| ENSSSCG00000026182 | novel     | I3LK92       | 3.124554811 | 1.01E-91  |
| ENSSSCG00000017416 | DHX58     | NM_001199132 | 3.106373417 | 0         |
| ENSSSCG00000024430 | HES4      | 24149        | 3.087923901 | 1.28E-32  |
| ENSSSCG00000027660 | IFI44L    | 17817        | 3.029625761 | 2.25E-45  |
| ENSSSCG00000002919 | TYROBP    | NM_214202    | 2.896003237 | 7.56E-18  |
| ENSSSCG00000017723 | CCL2      | NM_214214    | 2.864923623 | 1.41E-25  |
| ENSSSCG00000003763 | IFI44     | 16938        | 2.807764245 | 1.81E-18  |
| ENSSSCG00000023379 | UBE2L6    | F4ZS20       | 2.764804107 | 3.54E-15  |
| ENSSSCG00000010461 | ANKRD1    | NM_213922    | 2.740148077 | 9.90E-285 |
| ENSSSCG00000011874 | PARP14    | 29232        | 2.697062015 | 1.50E-110 |
| ENSSSCG00000017698 | CCL4      | NM_213779    | 2.634411825 | 9.22E-07  |
| ENSSSCG00000025560 | PGLYRP2   | NM_213738    | 2.561872937 | 3.12E-112 |
| ENSSSCG00000028525 | SAA4      | NM_001044552 | 2.555652415 | 1.23E-45  |
| ENSSSCG00000006940 | CYR61     | F1SEX1       | 2.528078759 | 1.35E-31  |
| ENSSSCG00000001394 | SUSC-MIC1 | NM_001114274 | 2.523276097 | 1.11E-298 |
| ENSSSCG00000013940 | NLRP3     | 16400        | 2.500425721 | 1.50E-37  |
| ENSSSCG00000024867 | ISG20     | 6130         | 2.497551336 | 4.53E-39  |
| ENSSSCG00000002471 | ISG12     | NM_001198921 | 2.474902616 | 4.30E-18  |
| ENSSSCG00000014564 | IFITM1    | A9QW81       | 2.473111131 | 2.06E-61  |
| ENSSSCG00000015897 | IFIH1     |              | 2.43203815  | 0         |

|                    |         |              |             |           |
|--------------------|---------|--------------|-------------|-----------|
| ENSSSCG00000016233 | PN-1    | NM_214287    | 2.399370672 | 1.66E-25  |
| ENSSSCG00000006719 | HSD3B1  | Q9N119       | 2.374062474 | 6.32E-202 |
| ENSSSCG00000000155 | TIMP3   | 11822        | 2.327259507 | 1.01E-261 |
| ENSSSCG00000010454 | IFIT5   | 13328        | 2.316026639 | 1.38E-11  |
| ENSSSCG00000026832 | CSF1    | NM_001244523 | 2.301142662 | 9.59E-09  |
| ENSSSCG00000026174 | GOLGA7B | 31668        | 2.298618499 | 2.55E-59  |
| ENSSSCG00000006815 | novel   |              | 2.184748274 | 9.10E-41  |
| ENSSSCG00000011393 | UBA7    | 12471        | 2.168305627 | 4.08E-66  |
| ENSSSCG00000016254 | CCL20   | NM_001024589 | 2.136009658 | 0         |
| ENSSSCG00000013369 | SAA1    |              | 2.116214736 | 2.76E-24  |
| ENSSSCG00000005316 | TPM2    | NM_001129947 | 2.106762938 | 1.40E-06  |
| ENSSSCG00000022447 | F3      | 3541         | 2.04309922  | 9.24E-09  |
| ENSSSCG00000016535 | CALD1   | 1441         | 2.030235975 | 0         |
| ENSSSCG00000002002 | IRF9    | 6131         | 2.017247555 | 1.74E-131 |
| ENSSSCG00000025206 | RNF19B  | 26886        | 2.000412109 | 6.74E-99  |
| ENSSSCG00000014780 | TRIM21  | 11312        | 1.97280739  | 1.20E-34  |
| ENSSSCG00000011876 | DTX3L   | 30323        | 1.956583841 | 3.00E-64  |
| ENSSSCG00000021943 | novel   | I3LPW3       | 1.935349714 | 1.84E-48  |
| ENSSSCG00000006924 | GBP1    | NM_001128473 | 1.934150952 | 4.27E-59  |
| ENSSSCG00000023178 | BATF2   | 25163        | 1.884668381 | 5.06E-08  |
| ENSSSCG00000017705 | CCL5    | NM_001129946 | 1.881750454 | 1.15E-05  |
| ENSSSCG00000016262 | SP140   | 17133        | 1.838525911 | 1.52E-68  |
| ENSSSCG00000017146 | RNF213  | 14539        | 1.83341397  | 3.22E-99  |
| ENSSSCG00000001473 | COL11A2 | A5D9L2       | 1.749090861 | 1.18E-40  |

|                    |          |              |             |             |
|--------------------|----------|--------------|-------------|-------------|
| ENSSSCG00000016925 | PLK2     | 19699        | 1.729104657 | 1.66E-181   |
| ENSSSCG00000010312 | PLAU     | 9052         | 1.721323486 | 2.78E-75    |
| ENSSSCG00000017148 | novel    | F1RZA4       | 1.719165534 | 4.93E-220   |
| ENSSSCG00000014670 | TRIM5    | NM_001044532 | 1.685084743 | 1.68E-40    |
| ENSSSCG00000016057 | STAT1    | NM_213769    | 1.679772215 | 4.14E-19    |
| ENSSSCG00000006543 | ADAR     | 225          | 1.676152574 | 0.000296531 |
| ENSSSCG00000006681 | TXNIP    | NM_001044614 | 1.668097705 | 5.88E-40    |
| ENSSSCG00000005625 | ENG      | 3349         | 1.619076045 | 1.14E-39    |
| ENSSSCG00000016991 | DUSP1    | F1RS00       | 1.616680241 | 6.14E-39    |
| ENSSSCG00000011904 | UPK1B    | 12578        | 1.602779784 | 2.11E-79    |
| ENSSSCG00000020893 | TAP      | NM_001044581 | 1.586974995 | 1.22E-197   |
| ENSSSCG00000014072 | ENC1     | 3345         | 1.571871148 | 3.67E-38    |
| ENSSSCG00000026759 | HMOX1    | 5013         | 1.570701244 | 3.83E-20    |
| ENSSSCG00000001456 | SLA-DQA1 | NM_001130224 | 1.543092652 | 4.22E-24    |
| ENSSSCG00000015073 | TAGLN    | 11553        | 1.527239936 | 1.52E-28    |
| ENSSSCG00000012853 | IRF7     | NM_001097428 | 1.525849128 | 1.20E-33    |
| ENSSSCG00000028384 | RND3     | 671          | 1.515058009 | 5.25E-90    |
| ENSSSCG00000011702 | TM4SF1   | 11853        | 1.492741628 | 1.33E-14    |
| ENSSSCG00000029475 | novel    | I3LLF7       | 1.485275207 | 2.06E-28    |
| ENSSSCG00000017614 | TRIM25   | 12932        | 1.455396743 | 0           |
| ENSSSCG00000017105 | UBE2QL1  | 37269        | 1.438739483 | 5.08E-93    |
| ENSSSCG00000008953 | IL8      | NM_213867    | 1.436370049 | 3.78E-65    |
| ENSSSCG00000013599 | ANGPTL4  | NM_001038644 | 1.399484763 | 1.50E-10    |
| ENSSSCG00000022913 | SLPI     | 11092        | 1.364977709 | 1.50E-192   |



|                     |               |              |             |           |
|---------------------|---------------|--------------|-------------|-----------|
| ENSSSCG00000001912  | PML           | 9113         | 1.356580251 | 2.69E-29  |
| ENSSSCG00000004682  | B2M           | NM_213978    | 1.350040322 | 6.01E-233 |
| ENSSSCG000000027269 | novel         |              | 1.333978742 | 1.27E-113 |
| ENSSSCG000000022484 | CH242-228L8.2 | F1RTC7       | 1.332106997 | 5.91E-126 |
| ENSSSCG000000021359 | novel         | F1S4Q9       | 1.32774076  | 6.37E-161 |
| ENSSSCG000000015612 | IRF6          | NM_214278    | 1.29744568  | 5.50E-22  |
| ENSSSCG000000017087 | GM2A          | 4367         | 1.288064776 | 1.56E-34  |
| ENSSSCG000000007032 | PLAT          | 9051         | 1.280079963 | 4.39E-33  |
| ENSSSCG000000006589 | S100A12       | NM_001160272 | 1.272862434 | 9.76E-28  |
| ENSSSCG000000000368 | MMP19         | 7165         | 1.261609326 | 1.36E-42  |
| ENSSSCG000000022111 | novel         | I3LK35       | 1.254390066 | 9.85E-13  |
| ENSSSCG000000024161 | SLA-7         | NM_213768    | 1.251768684 | 6.42E-63  |
| ENSSSCG000000012890 | TCIRG1        | 11647        | 1.247861397 | 1.98E-80  |
| ENSSSCG000000001233 | TRIM26        | NM_001123209 | 1.246565759 | 6.52E-47  |
| ENSSSCG000000029949 | CD248         | 18219        | 1.235130515 | 7.68E-12  |
| ENSSSCG000000017616 | novel         | F1RSC4       | 1.214379101 | 3.23E-27  |
| ENSSSCG000000003451 | PDPN          | 29602        | 1.211525369 | 8.19E-128 |
| ENSSSCG000000027607 | IER3          | 5392         | 1.175048265 | 9.24E-26  |
| ENSSSCG000000011357 | SHISA5        | 30376        | 1.151323247 | 5.15E-215 |
| ENSSSCG000000001341 | SLA-11        | F1RUD0       | 1.140348803 | 1.34E-98  |
| ENSSSCG000000004154 | TNFAIP3       | 11896        | 1.131683804 | 2.01E-23  |
| ENSSSCG000000003832 | TACSTD2       | 11530        | 1.126387196 | 6.09E-27  |
| ENSSSCG000000017082 | novel         | F1RQB3       | 1.110435362 | 1.37E-09  |
| ENSSSCG000000017754 | LGALS9        | NM_213932    | 1.102162281 | 3.25E-61  |

|                    |         |              |              |             |
|--------------------|---------|--------------|--------------|-------------|
| ENSSSCG00000028304 | ZFP36L1 | 1107         | 1.088003423  | 4.01E-81    |
| ENSSSCG00000022576 | VGf     | 12684        | 1.057135021  | 1.73E-66    |
| ENSSSCG00000030835 | BLCAP   | 1055         | 1.043885476  | 8.16E-75    |
| ENSSSCG00000017199 | TRIM47  | 19020        | 1.021622797  | 4.06E-54    |
| ENSSSCG00000022370 | TNFSF9  | 11939        | 1.01473239   | 5.71E-33    |
| ENSSSCG00000026169 | MFSD12  | 28299        | 1.01314651   | 0.000134909 |
| ENSSSCG00000000293 | ITGA5   | F1SR53       | 1.013138853  | 2.10E-10    |
| ENSSSCG00000010624 | DUSP5   | 3071         | 1.00681917   | 1.01E-48    |
| ENSSSCG00000021641 | PDGFB   | 8800         | 1.003927499  | 9.01E-59    |
| ENSSSCG00000016117 | CARF    | 14435        | 1.003542798  | 1.22E-09    |
| ENSSSCG00000001377 | PPP1R18 | 29413        | 0.973670325  | 7.00E-32    |
| ENSSSCG00000012873 | CCND1   | 1582         | 0.969229042  | 3.17E-128   |
| ENSSSCG00000024669 | NBL1    | I3LKM2       | 0.966556093  | 1.06E-15    |
| ENSSSCG00000029998 | KLF7    | NP_001090956 | 0.950009297  | 1.66E-25    |
| ENSSSCG00000002704 | KARS    | 6215         | -0.911171633 | 2.21E-153   |
| ENSSSCG00000000849 | HSP90B1 | 12028        | -0.93452704  | 1.13E-39    |
| ENSSSCG00000021332 | PAX8    | 8622         | -0.971018097 | 1.47E-115   |
| ENSSSCG00000009978 | AP1B1   | 554          | -0.975159854 | 1.02E-31    |
| ENSSSCG00000004963 | novel   | F1SIU2       | -0.978779937 | 9.95E-27    |
| ENSSSCG00000025437 | novel   | I3LVG0       | -0.986758757 | 1.09E-62    |
| ENSSSCG00000009501 | DZIP1   | 20908        | -0.992195201 | 2.72E-28    |
| ENSSSCG00000007334 | SRC     | 11283        | -0.996333221 | 5.31E-196   |
| ENSSSCG00000005934 | TRAPPC9 | 30832        | -1.008723934 | 1.81E-150   |
| ENSSSCG00000010118 | HIRA    | 4916         | -1.02769447  | 1.46E-265   |

|                    |         |              |              |           |
|--------------------|---------|--------------|--------------|-----------|
| ENSSSCG00000000522 | NAP1L1  | NM_001244316 | -1.029229206 | 4.58E-36  |
| ENSSSCG00000027525 | DHCR24  | NM_001243354 | -1.044194011 | 8.23E-15  |
| ENSSSCG00000004058 | EZR     | 12691        | -1.052407347 | 2.03E-18  |
| ENSSSCG00000028960 | novel   | I3L7C2       | -1.055723347 | 0         |
| ENSSSCG00000005663 | CCBL1   | 1564         | -1.057286121 | 1.39E-103 |
| ENSSSCG00000028381 | FLYWCH1 | 25404        | -1.058790047 | 5.90E-06  |
| ENSSSCG00000015983 | HOXD8   | 5139         | -1.062380214 | 1.69E-63  |
| ENSSSCG00000025831 | NREP    | F1RLG1       | -1.071542751 | 8.70E-53  |
| ENSSSCG00000000094 | SUN2    | 14210        | -1.075663689 | 1.16E-136 |
| ENSSSCG00000010554 | SCD     | NM_213781    | -1.075951669 | 2.98E-35  |
| ENSSSCG00000022858 | CS      | P00889       | -1.076648505 | 3.88E-103 |
| ENSSSCG00000005601 | HSPA5   | F1RS36       | -1.083246933 | 6.61E-71  |
| ENSSSCG00000020821 | novel   | I3LR79       | -1.086014937 | 1.00E-10  |
| ENSSSCG00000015105 | SLC37A4 | NM_001199719 | -1.086474577 | 2.39E-69  |
| ENSSSCG00000016974 | MAP1B   | 6836         | -1.087606455 | 8.58E-249 |
| ENSSSCG00000012247 | ATP6AP2 | F1RXN8       | -1.109353981 | 5.47E-58  |
| ENSSSCG00000021091 | CS      | 2422         | -1.135976133 | 8.74E-25  |
| ENSSSCG00000004206 | novel   | F1S2Z5       | -1.148387078 | 8.83E-42  |
| ENSSSCG00000023050 | SEPT10  | 14349        | -1.162699321 | 5.15E-156 |
| ENSSSCG00000015849 | TMEM66  | 28789        | -1.167614071 | 1.06E-17  |
| ENSSSCG00000024388 | BNIP3   | 1084         | -1.172427348 | 1.24E-32  |
| ENSSSCG00000007160 | DDRKG1  | NM_001190212 | -1.186934894 | 3.36E-24  |
| ENSSSCG00000025941 | PTP4A1  | I3L887       | -1.190094083 | 8.42E-50  |
| ENSSSCG00000029698 | LRRC42  | 28792        | -1.191801907 | 1.31E-121 |

|                    |                |              |              |           |
|--------------------|----------------|--------------|--------------|-----------|
| ENSSSCG00000003806 | LEPROT         | NM_001145388 | -1.208367689 | 8.60E-35  |
| ENSSSCG00000008733 | RAB28          | 9768         | -1.209695468 | 1.31E-14  |
| ENSSSCG00000017666 | CH242-205G24.7 | NP_001139599 | -1.216645729 | 6.14E-52  |
| ENSSSCG00000027689 | SRM            | 11296        | -1.216726744 | 2.88E-29  |
| ENSSSCG00000008466 | COX7A2L        | 2289         | -1.227413098 | 1.02E-30  |
| ENSSSCG00000016975 | PTCD2          | 25734        | -1.228596555 | 1.62E-118 |
| ENSSSCG00000000022 | LDOC1L         | 13343        | -1.2293588   | 7.00E-32  |
| ENSSSCG00000016027 | ITGAV          | NM_001083932 | -1.232109973 | 1.37E-114 |
| ENSSSCG00000024752 | ALDH4A1        | 406          | -1.235066987 | 1.41E-12  |
| ENSSSCG00000015103 | RPS25          | 10413        | -1.240711651 | 1.42E-77  |
| ENSSSCG00000007692 | YWHAG          | 12852        | -1.251160315 | 2.40E-07  |
| ENSSSCG00000015797 | SORBS2         | P28220       | -1.264979592 | 2.71E-45  |
| ENSSSCG00000014833 | UCP2           | NM_214289    | -1.278954094 | 1.60E-24  |
| ENSSSCG00000014047 | FGFR4          | F1S3B8       | -1.280439152 | 1.21E-162 |
| ENSSSCG00000008602 | LAPTM4A        | 6924         | -1.298883338 | 2.42E-16  |
| ENSSSCG00000028727 | novel          | I3L7W2       | -1.30093721  | 3.03E-32  |
| ENSSSCG00000021104 | novel          |              | -1.304858391 | 2.92E-13  |
| ENSSSCG00000011850 | MUC4           | NM_001206344 | -1.306405144 | 6.56E-21  |
| ENSSSCG00000027669 | TNS1           | 11973        | -1.315091853 | 3.58E-06  |
| ENSSSCG0000001008  | BPHL           | 1094         | -1.326616455 | 1.26E-194 |
| ENSSSCG00000027417 | LDLRAD4        | 1224         | -1.328713366 | 2.47E-112 |
| ENSSSCG00000002718 | FA2H           | 21197        | -1.336913    | 9.86E-22  |
| ENSSSCG00000012365 | MSN            | NM_001009578 | -1.345821796 | 3.42E-53  |
| ENSSSCG00000022659 | CLTC           | I3LGD4       | -1.362579682 | 3.65E-17  |

|                    |          |              |              |           |
|--------------------|----------|--------------|--------------|-----------|
| ENSSSCG00000001868 | TSPAN3   | NM_001244196 | -1.381873369 | 6.50E-19  |
| ENSSSCG00000006544 | UBE2Q1   | 15698        | -1.390424111 | 3.50E-98  |
| ENSSSCG00000017880 | SPNS3    | 28433        | -1.390938786 | 0         |
| ENSSSCG00000008966 | PARM1    | NM_001243716 | -1.397623568 | 1.93E-36  |
| ENSSSCG00000030240 | novel    | I3LIP1       | -1.40481458  | 8.55E-256 |
| ENSSSCG00000011133 | PFKFB3   | 8874         | -1.411213043 | 2.37E-57  |
| ENSSSCG00000002740 | AP1G1    | F1S3C7       | -1.449088285 | 1.21E-52  |
| ENSSSCG00000010543 | ABCC2    | 53           | -1.454793573 | 0         |
| ENSSSCG00000022009 | AADC     | NP_999019    | -1.456366914 | 3.45E-31  |
| ENSSSCG00000012774 | DUSP9    |              | -1.461140011 | 2.52E-145 |
| ENSSSCG00000008274 | DCTN1    | F1SNT8       | -1.465024137 | 9.77E-06  |
| ENSSSCG00000030648 | novel    | I3LPB3       | -1.473844669 | 2.02E-51  |
| ENSSSCG00000028069 | ATP2B4   | I3LSA3       | -1.476953589 | 3.51E-17  |
| ENSSSCG00000027256 | CNIH     | NM_001243525 | -1.513032432 | 7.16E-46  |
| ENSSSCG00000015273 | novel    | F1S6B3       | -1.529242285 | 1.32E-64  |
| ENSSSCG00000027450 | novel    | NP_001230531 | -1.531083624 | 4.38E-30  |
| ENSSSCG00000011906 | IGSF11   | 16669        | -1.538886858 | 6.29E-29  |
| ENSSSCG00000016695 | novel    | F1SHU0       | -1.543001725 | 8.64E-07  |
| ENSSSCG00000001137 | HIST1H1D | 4717         | -1.55593831  | 1.43E-55  |
| ENSSSCG00000004586 | FAM81A   | 28379        | -1.584223556 | 5.23E-28  |
| ENSSSCG00000011845 | PCYT1A   | 8754         | -1.606815184 | 0         |
| ENSSSCG00000029589 | novel    | I3LUZ8       | -1.613534595 | 2.73E-31  |
| ENSSSCG00000017448 | KRT19    | F1S0J8       | -1.614922506 | 4.84E-23  |
| ENSSSCG00000014125 | DHFR     | NM_001244064 | -1.670357601 | 1.09E-215 |

|                    |          |              |              |           |
|--------------------|----------|--------------|--------------|-----------|
| ENSSSCG00000006838 | TMEM167B | F1S5Z0       | -1.675569947 | 5.01E-54  |
| ENSSSCG00000005491 | ATP6V1G1 | NM_001190194 | -1.685455512 | 1.96E-171 |
| ENSSSCG00000014073 | HEXB     | NM_213921    | -1.706219402 | 1.66E-217 |
| ENSSSCG00000016370 | SEPT2    | NM_001243793 | -1.766021157 | 5.54E-245 |
| ENSSSCG00000008449 | SLC3A1   | NM_001123042 | -1.782251972 | 0         |
| ENSSSCG00000022417 | HNF1B    | NM_213956    | -1.793501374 | 0         |
| ENSSSCG00000012957 | SF3B2    | F1RU38       | -1.800687321 | 4.62E-85  |
| ENSSSCG00000004807 | SCG5     | NP_001098757 | -1.800742784 | 3.96E-29  |
| ENSSSCG00000028740 | CTDSPL   | I3L819       | -1.80138116  | 0         |
| ENSSSCG00000017885 | SMTNL2   | F1RGN8       | -1.957409172 | 5.21E-19  |
| ENSSSCG00000021564 | IRX5     | I3L8M8       | -2.001943613 | 1.25E-48  |
| ENSSSCG00000003617 | TXLNA    |              | -2.160652899 | 2.85E-12  |
| ENSSSCG00000009216 | SPP1     | NM_214023    | -2.172777202 | 2.40E-10  |
| ENSSSCG00000015798 | ANKRD37  | F1RZN8       | -2.180607007 | 2.63E-87  |
| ENSSSCG00000006693 | PDZK1    | 8821         | -2.2445841   | 4.00E-283 |
| ENSSSCG00000005240 | DOCK8    | F1SJE9       | -2.294181514 | 2.65E-06  |
| ENSSSCG00000016872 | HMGCS1   | F1SMG8       | -2.374787687 | 2.38E-05  |
| ENSSSCG00000003744 | novel    | F1SAI5       | -2.396718131 | 5.80E-21  |
| ENSSSCG00000029488 | ADAMTS1  | I3LDG0       | -2.415897687 | 4.11E-27  |
| ENSSSCG00000000500 | RAB3IP   | F1SH42       | -2.503477823 | 3.75E-263 |
| ENSSSCG00000018048 | SLC5A10  | NM_001012297 | -2.571092456 | 5.76E-17  |
| ENSSSCG00000012026 | ADAMTS1  | NM_001144843 | -2.572268516 | 2.04E-37  |
| ENSSSCG00000010400 | MSMB     | NM_213852    | -2.576722987 | 5.26E-95  |
| ENSSSCG00000004920 | novel    | F1SM36       | -3.016082575 | 2.52E-05  |

|                    |        |              |              |             |
|--------------------|--------|--------------|--------------|-------------|
| ENSSSCG00000004676 | DUOXA2 | NM_001243550 | -3.277297188 | 2.91E-17    |
| ENSSSCG00000024743 | PRR15L | I3LNV1       | -3.354929211 | 0.000456212 |
| ENSSSCG00000003797 | DIRAS3 | NM_001044598 | -3.495079167 | 8.51E-33    |
| ENSSSCG00000005979 | ANXA13 | F1RRP6       | -3.872277985 | 9.67E-77    |
| ENSSSCG00000011663 | RBP2   | NM_214451    | -9.067476454 | 4.87E-06    |

**Supplementary Table S5. Gene Ontology analysis for DEGs.** (a) Biological process. (b) Molecular function. (c) Cell component.

| Items                                                                           | fold Enrichment | P-value  |
|---------------------------------------------------------------------------------|-----------------|----------|
| ISG15-protein conjugation (GO:0032020)                                          | 67.93           | 2.91E-03 |
| negative regulation of viral genome replication (GO:0045071)                    | 21.08           | 3.40E-03 |
| negative regulation of viral process (GO:0048525)                               | 17.64           | 2.20E-05 |
| negative regulation of viral life cycle (GO:1903901)                            | 17.64           | 2.20E-05 |
| neutrophil chemotaxis (GO:0030593)                                              | 14.56           | 2.82E-02 |
| defense response to virus (GO:0051607)                                          | 13.99           | 1.96E-08 |
| regulation of viral genome replication (GO:0045069)                             | 13.29           | 4.71E-02 |
| neutrophil migration (GO:1990266)                                               | 13.29           | 4.71E-02 |
| negative regulation of multi-organism process (GO:0043901)                      | 11.99           | 4.03E-06 |
| response to virus (GO:0009615)                                                  | 10.4            | 1.99E-07 |
| regulation of viral life cycle (GO:1903900)                                     | 9.86            | 2.91E-03 |
| regulation of viral process (GO:0050792)                                        | 9.26            | 4.86E-03 |
| regulation of symbiosis, encompassing mutualism through parasitism (GO:0043903) | 8.56            | 2.39E-03 |
| positive regulation of ERK1 and ERK2 cascade (GO:0070374)                       | 7.77            | 2.01E-02 |

|                                                        |      |          |
|--------------------------------------------------------|------|----------|
| immune effector process (GO:0002252)                   | 7.16 | 2.79E-06 |
| regulation of ERK1 and ERK2 cascade (GO:0070372)       | 6.92 | 4.97E-03 |
| innate immune response (GO:0045087)                    | 5.7  | 5.79E-04 |
| defense response to other organism (GO:0098542)        | 5.38 | 4.67E-04 |
| response to biotic stimulus (GO:0009607)               | 5.08 | 1.06E-07 |
| regulation of multi-organism process (GO:0043900)      | 5.02 | 6.95E-03 |
| defense response (GO:0006952)                          | 4.72 | 1.57E-08 |
| response to other organism (GO:0051707)                | 4.56 | 3.07E-05 |
| response to external biotic stimulus (GO:0043207)      | 4.55 | 3.19E-05 |
| response to cytokine (GO:0034097)                      | 4.23 | 2.43E-03 |
| immune response (GO:0006955)                           | 4.21 | 1.25E-05 |
| cell migration (GO:0016477)                            | 3.74 | 1.33E-02 |
| immune system process (GO:0002376)                     | 3.6  | 1.23E-08 |
| localization of cell (GO:0051674)                      | 3.52 | 1.67E-02 |
| cell motility (GO:0048870)                             | 3.52 | 1.67E-02 |
| response to external stimulus (GO:0009605)             | 3.46 | 5.38E-07 |
| movement of cell or subcellular component (GO:0006928) | 2.87 | 4.36E-02 |
| multi-organism process (GO:0051704)                    | 2.61 | 3.69E-02 |
| response to stress (GO:0006950)                        | 2.43 | 2.87E-04 |
| Unclassified (UNCLASSIFIED)                            | 0.79 | 0.00E+00 |

(a)

| Items                     | fold Enrichment | P-value  |
|---------------------------|-----------------|----------|
| TAP2 binding (GO:0046979) | > 100           | 9.77E-03 |



|                                                                        |       |          |
|------------------------------------------------------------------------|-------|----------|
| TAP binding (GO:0046977)                                               | > 100 | 9.77E-03 |
| fatty acid alpha-hydroxylase activity (GO:0080132)                     | > 100 | 9.77E-03 |
| UMP kinase activity (GO:0033862)                                       | > 100 | 9.77E-03 |
| lysine-tRNA ligase activity (GO:0004824)                               | > 100 | 9.77E-03 |
| double-stranded RNA adenosine deaminase activity (GO:0003726)          | > 100 | 1.89E-04 |
| thymidylate kinase activity (GO:0004798)                               | > 100 | 9.77E-03 |
| steroid delta-isomerase activity (GO:0004769)                          | > 100 | 9.77E-03 |
| spermidine synthase activity (GO:0004766)                              | > 100 | 9.77E-03 |
| 3-hydroxyisobutyrate dehydrogenase activity (GO:0008442)               | > 100 | 9.77E-03 |
| morphogen activity (GO:0016015)                                        | > 100 | 9.77E-03 |
| interleukin-8 receptor binding (GO:0005153)                            | > 100 | 9.77E-03 |
| delta24(24-1) sterol reductase activity (GO:0000246)                   | > 100 | 9.77E-03 |
| Mo-molybdopterin cofactor sulfurase activity (GO:0008265)              | > 100 | 9.77E-03 |
| ISG15-specific protease activity (GO:0019785)                          | > 100 | 9.77E-03 |
| ISG15 activating enzyme activity (GO:0019782)                          | > 100 | 9.77E-03 |
| CCR2 chemokine receptor binding (GO:0031727)                           | > 100 | 9.77E-03 |
| 1-pyrroline-5-carboxylate dehydrogenase activity (GO:0003842)          | 50.95 | 1.94E-02 |
| citrate synthase activity (GO:0036440)                                 | 50.95 | 1.94E-02 |
| citrate (Si)-synthase activity (GO:0004108)                            | 50.95 | 1.94E-02 |
| extracellular matrix protein binding (GO:1990430)                      | 50.95 | 1.94E-02 |
| ISG15 transferase activity (GO:0042296)                                | 50.95 | 7.47E-04 |
| phosphogluconate dehydrogenase (decarboxylating) activity (GO:0004616) | 50.95 | 7.47E-04 |
| hydroxymethylglutaryl-CoA synthase activity (GO:0004421)               | 50.95 | 1.94E-02 |
| cobalt ion binding (GO:0050897)                                        | 50.95 | 1.94E-02 |

|                                                                                                           |       |          |
|-----------------------------------------------------------------------------------------------------------|-------|----------|
| 2'-5'-oligoadenylate synthetase activity (GO:0001730)                                                     | 50.95 | 1.94E-02 |
| RAGE receptor binding (GO:0050786)                                                                        | 40.76 | 1.16E-03 |
| uridylate kinase activity (GO:0009041)                                                                    | 33.97 | 2.90E-02 |
| ubiquitin activating enzyme activity (GO:0004839)                                                         | 33.97 | 2.90E-02 |
| single-stranded DNA 3'-5' exodeoxyribonuclease activity (GO:0008310)                                      | 33.97 | 2.90E-02 |
| peptide-transporting ATPase activity (GO:0015440)                                                         | 33.97 | 2.90E-02 |
| Toll-like receptor 4 binding (GO:0035662)                                                                 | 33.97 | 2.90E-02 |
| transferase activity, transferring acyl groups, acyl groups converted into alkyl on transfer (GO:0046912) | 29.11 | 2.24E-03 |
| peptide antigen binding (GO:0042605)                                                                      | 27.17 | 1.69E-05 |
| 6-phosphofructo-2-kinase activity (GO:0003873)                                                            | 25.47 | 3.85E-02 |
| phosphatidylglycerol binding (GO:1901611)                                                                 | 25.47 | 3.85E-02 |
| arachidonic acid binding (GO:0050544)                                                                     | 25.47 | 3.85E-02 |
| icosatetraenoic acid binding (GO:0050543)                                                                 | 25.47 | 3.85E-02 |
| icosanoid binding (GO:0050542)                                                                            | 25.47 | 3.85E-02 |
| fibroblast growth factor-activated receptor activity (GO:0005007)                                         | 25.47 | 3.85E-02 |
| beta-N-acetylhexosaminidase activity (GO:0004563)                                                         | 25.47 | 3.85E-02 |
| 3-beta-hydroxy-delta5-steroid dehydrogenase activity (GO:0003854)                                         | 20.38 | 4.79E-02 |
| peptide transporter activity (GO:0015197)                                                                 | 20.38 | 4.79E-02 |
| cytidylate kinase activity (GO:0004127)                                                                   | 20.38 | 4.79E-02 |
| natural killer cell lectin-like receptor binding (GO:0046703)                                             | 20.38 | 4.79E-02 |
| sphingolipid transporter activity (GO:0046624)                                                            | 20.38 | 4.79E-02 |
| long-chain fatty acid binding (GO:0036041)                                                                | 20.38 | 4.79E-02 |
| opsonin binding (GO:0001846)                                                                              | 20.38 | 4.79E-02 |
| adenosine deaminase activity (GO:0004000)                                                                 | 18.53 | 5.40E-03 |

|                                                                                                        |       |          |
|--------------------------------------------------------------------------------------------------------|-------|----------|
| MAP kinase tyrosine/serine/threonine phosphatase activity (GO:0017017)                                 | 15.68 | 7.45E-03 |
| MAP kinase phosphatase activity (GO:0033549)                                                           | 14.56 | 8.58E-03 |
| calcium-transporting ATPase activity (GO:0005388)                                                      | 13.59 | 9.79E-03 |
| CCR chemokine receptor binding (GO:0048020)                                                            | 13.29 | 1.60E-03 |
| antigen binding (GO:0003823)                                                                           | 12.13 | 6.77E-05 |
| extracellular matrix binding (GO:0050840)                                                              | 11.99 | 3.87E-04 |
| chemokine activity (GO:0008009)                                                                        | 11.02 | 5.30E-04 |
| insulin-like growth factor binding (GO:0005520)                                                        | 10.92 | 2.79E-03 |
| R-SMAD binding (GO:0070412)                                                                            | 10.73 | 1.53E-02 |
| chemokine receptor binding (GO:0042379)                                                                | 9.94  | 7.75E-04 |
| protein kinase C binding (GO:0005080)                                                                  | 9.26  | 2.01E-02 |
| double-stranded RNA binding (GO:0003725)                                                               | 9.06  | 1.09E-03 |
| ubiquitin conjugating enzyme activity (GO:0061631)                                                     | 8.86  | 2.19E-02 |
| chemoattractant activity (GO:0042056)                                                                  | 8.86  | 2.19E-02 |
| ubiquitin-like protein conjugating enzyme activity (GO:0061650)                                        | 8.49  | 2.37E-02 |
| deaminase activity (GO:0019239)                                                                        | 8.49  | 2.37E-02 |
| single-stranded RNA binding (GO:0003727)                                                               | 8.04  | 6.48E-03 |
| protein tyrosine/serine/threonine phosphatase activity (GO:0008138)                                    | 7.64  | 7.46E-03 |
| hydrolase activity, acting on carbon-nitrogen (but not peptide) bonds, in cyclic amidines (GO:0016814) | 7.55  | 2.94E-02 |
| PDZ domain binding (GO:0030165)                                                                        | 7.11  | 9.07E-03 |
| integrin binding (GO:0005178)                                                                          | 6.27  | 4.08E-03 |
| SMAD binding (GO:0046332)                                                                              | 5.99  | 1.43E-02 |
| protease binding (GO:0002020)                                                                          | 5.91  | 5.03E-03 |
| ATPase activity, coupled to transmembrane movement of ions, phosphorylative mechanism (GO:0015662)     | 5.82  | 4.69E-02 |

|                                                                                                             |      |          |
|-------------------------------------------------------------------------------------------------------------|------|----------|
| cation-transporting ATPase activity (GO:0019829)                                                            | 5.18 | 2.09E-02 |
| ATPase coupled ion transmembrane transporter activity (GO:0042625)                                          | 5.18 | 2.09E-02 |
| growth factor binding (GO:0019838)                                                                          | 4.85 | 9.87E-03 |
| hydrolase activity, acting on acid anhydrides, catalyzing transmembrane movement of substances (GO:0016820) | 4.7  | 1.95E-03 |
| heparin binding (GO:0008201)                                                                                | 4.38 | 1.39E-02 |
| cell adhesion molecule binding (GO:0050839)                                                                 | 4.25 | 6.99E-03 |
| ubiquitin-like protein transferase activity (GO:0019787)                                                    | 4.21 | 8.26E-06 |
| ATPase activity, coupled to transmembrane movement of substances (GO:0042626)                               | 4.08 | 8.24E-03 |
| ubiquitin-protein transferase activity (GO:0004842)                                                         | 4.05 | 2.58E-05 |
| P-P-bond-hydrolysis-driven transmembrane transporter activity (GO:0015405)                                  | 3.92 | 9.64E-03 |
| primary active transmembrane transporter activity (GO:0015399)                                              | 3.92 | 9.64E-03 |
| cytokine activity (GO:0005125)                                                                              | 3.88 | 2.47E-03 |
| oxidoreductase activity, acting on CH-OH group of donors (GO:0016614)                                       | 3.51 | 2.83E-02 |
| ATPase activity, coupled to movement of substances (GO:0043492)                                             | 3.42 | 1.65E-02 |
| glycosaminoglycan binding (GO:0005539)                                                                      | 3.31 | 3.39E-02 |
| ligase activity (GO:0016874)                                                                                | 2.6  | 4.52E-02 |
| receptor binding (GO:0005102)                                                                               | 2.16 | 6.10E-04 |
| zinc ion binding (GO:0008270)                                                                               | 1.9  | 7.40E-03 |
| RNA binding (GO:0003723)                                                                                    | 1.89 | 2.60E-03 |
| poly(A) RNA binding (GO:0044822)                                                                            | 1.85 | 1.42E-02 |
| transition metal ion binding (GO:0046914)                                                                   | 1.69 | 1.55E-02 |
| enzyme binding (GO:0019899)                                                                                 | 1.64 | 2.38E-02 |
| protein binding (GO:0005515)                                                                                | 1.43 | 1.54E-03 |
| nucleic acid binding (GO:0003676)                                                                           | 1.31 | 4.34E-02 |

|                                                        |       |          |
|--------------------------------------------------------|-------|----------|
| binding (GO:0005488)                                   | 1.28  | 1.02E-04 |
| heterocyclic compound binding (GO:1901363)             | 1.24  | 3.94E-02 |
| organic cyclic compound binding (GO:0097159)           | 1.22  | 4.86E-02 |
| molecular_function (GO:0003674)                        | 1.11  | 1.09E-02 |
| Unclassified (UNCLASSIFIED)                            | 0.76  | 1.09E-02 |
| signal transducer activity (GO:0004871)                | < 0.2 | 6.87E-06 |
| receptor activity (GO:0004872)                         | < 0.2 | 2.06E-06 |
| molecular transducer activity (GO:0060089)             | < 0.2 | 2.06E-06 |
| transmembrane signaling receptor activity (GO:0004888) | < 0.2 | 3.14E-06 |
| transmembrane receptor activity (GO:0099600)           | < 0.2 | 2.15E-06 |
| signaling receptor activity (GO:0038023)               | < 0.2 | 1.42E-06 |

(b)

| <b>GO cellular component complete</b>                       | <b>fold Enrichment</b> | <b>P-value</b> |
|-------------------------------------------------------------|------------------------|----------------|
| glycogen granule (GO:0042587)                               | > 100                  | 9.77E-03       |
| integrin alphav-beta8 complex (GO:0034686)                  | > 100                  | 9.77E-03       |
| integrin alphav-beta3 complex (GO:0034683)                  | > 100                  | 9.77E-03       |
| integrin alpha8-beta1 complex (GO:0034678)                  | > 100                  | 9.77E-03       |
| supraspliceosomal complex (GO:0044530)                      | 50.95                  | 1.94E-02       |
| alphav-beta3 integrin-IGF-1-IGF1R complex (GO:0035867)      | 50.95                  | 1.94E-02       |
| integrin alphav-beta5 complex (GO:0034684)                  | 50.95                  | 1.94E-02       |
| TAP complex (GO:0042825)                                    | 50.95                  | 1.94E-02       |
| cytoplasmic side of apical plasma membrane (GO:0098592)     | 50.95                  | 1.94E-02       |
| trans-Golgi network transport vesicle membrane (GO:0012510) | 40.76                  | 1.16E-03       |

|                                                                      |       |          |
|----------------------------------------------------------------------|-------|----------|
| clathrin coat of trans-Golgi network vesicle (GO:0030130)            | 40.76 | 1.16E-03 |
| extrinsic component of endoplasmic reticulum membrane (GO:0042406)   | 33.97 | 2.90E-02 |
| extrinsic component of external side of plasma membrane (GO:0031232) | 33.97 | 2.90E-02 |
| actin cap (GO:0030478)                                               | 33.97 | 2.90E-02 |
| TCR signalosome (GO:0036398)                                         | 33.97 | 2.90E-02 |
| terminal web (GO:1990357)                                            | 33.97 | 2.90E-02 |
| MHC class I peptide loading complex (GO:0042824)                     | 33.97 | 2.90E-02 |
| MHC class I protein complex (GO:0042612)                             | 30.57 | 1.44E-04 |
| smooth muscle contractile fiber (GO:0030485)                         | 25.47 | 3.85E-02 |
| cytolytic granule (GO:0044194)                                       | 25.47 | 3.85E-02 |
| NLRP3 inflammasome complex (GO:0072559)                              | 25.47 | 3.85E-02 |
| clathrin coat of coated pit (GO:0030132)                             | 22.64 | 3.66E-03 |
| inflammasome complex (GO:0061702)                                    | 20.38 | 4.79E-02 |
| MHC protein complex (GO:0042611)                                     | 20.38 | 5.15E-05 |
| ciliary transition fiber (GO:0097539)                                | 20.38 | 4.79E-02 |
| intercellular canaliculus (GO:0046581)                               | 20.38 | 4.79E-02 |
| trans-Golgi network transport vesicle (GO:0030140)                   | 18.53 | 5.40E-03 |
| clathrin vesicle coat (GO:0030125)                                   | 18.53 | 5.40E-03 |
| clathrin-coated vesicle membrane (GO:0030665)                        | 14.56 | 8.58E-03 |
| high-density lipoprotein particle (GO:0034364)                       | 13.59 | 9.79E-03 |
| clathrin coat (GO:0030118)                                           | 12.74 | 3.08E-04 |
| integrin complex (GO:0008305)                                        | 12.74 | 1.81E-03 |
| protein complex involved in cell adhesion (GO:0098636)               | 12.74 | 1.81E-03 |
| ruffle membrane (GO:0032587)                                         | 12.35 | 3.46E-04 |

|                                                                 |       |          |
|-----------------------------------------------------------------|-------|----------|
| vacuolar proton-transporting V-type ATPase complex (GO:0016471) | 11.99 | 1.24E-02 |
| lipoprotein particle (GO:1990777)                               | 9.7   | 1.85E-02 |
| plasma lipoprotein particle (GO:0034358)                        | 9.7   | 1.85E-02 |
| clathrin adaptor complex (GO:0030131)                           | 8.86  | 2.19E-02 |
| protein-lipid complex (GO:0032994)                              | 8.86  | 2.19E-02 |
| proton-transporting V-type ATPase complex (GO:0033176)          | 8.49  | 2.37E-02 |
| Golgi-associated vesicle membrane (GO:0030660)                  | 8.49  | 2.37E-02 |
| ruffle (GO:0001726)                                             | 7.84  | 1.38E-04 |
| leading edge membrane (GO:0031256)                              | 7.41  | 2.26E-03 |
| clathrin-coated pit (GO:0005905)                                | 7.28  | 3.14E-02 |
| cortical actin cytoskeleton (GO:0030864)                        | 7.28  | 3.14E-02 |
| filopodium (GO:0030175)                                         | 6.5   | 1.15E-02 |
| vesicle coat (GO:0030120)                                       | 6.37  | 4.00E-02 |
| AP-type membrane coat adaptor complex (GO:0030119)              | 6.18  | 4.23E-02 |
| microvillus (GO:0005902)                                        | 6.18  | 4.23E-02 |
| clathrin-coated vesicle (GO:0030136)                            | 6.11  | 1.36E-02 |
| postsynaptic density (GO:0097481)                               | 5.99  | 4.46E-02 |
| membrane coat (GO:0030117)                                      | 5.58  | 6.12E-03 |
| coated membrane (GO:0048475)                                    | 5.58  | 6.12E-03 |
| cell projection membrane (GO:0031253)                           | 4.81  | 4.19E-03 |
| cell leading edge (GO:0031252)                                  | 4.36  | 5.87E-04 |
| proteinaceous extracellular matrix (GO:0005578)                 | 3.99  | 5.10E-04 |
| extracellular matrix (GO:0031012)                               | 3.89  | 7.65E-05 |
| external side of plasma membrane (GO:0009897)                   | 3.35  | 1.78E-02 |

|                                                                            |      |          |
|----------------------------------------------------------------------------|------|----------|
| apical plasma membrane (GO:0016324)                                        | 3.06 | 4.31E-02 |
| apical part of cell (GO:0045177)                                           | 2.89 | 3.08E-02 |
| side of membrane (GO:0098552)                                              | 2.65 | 1.78E-02 |
| plasma membrane region (GO:0098590)                                        | 2.49 | 7.68E-03 |
| plasma membrane protein complex (GO:0098797)                               | 2.46 | 1.21E-02 |
| actin cytoskeleton (GO:0015629)                                            | 2.35 | 3.11E-02 |
| lysosome (GO:0005764)                                                      | 2.35 | 4.45E-02 |
| lytic vacuole (GO:0000323)                                                 | 2.33 | 4.59E-02 |
| endoplasmic reticulum membrane (GO:0005789)                                | 2.27 | 2.65E-02 |
| nuclear outer membrane-endoplasmic reticulum membrane network (GO:0042175) | 2.23 | 2.92E-02 |
| cell surface (GO:0009986)                                                  | 2.02 | 3.65E-02 |
| extracellular space (GO:0005615)                                           | 2.01 | 4.17E-03 |
| membrane protein complex (GO:0098796)                                      | 1.84 | 1.77E-02 |
| bounding membrane of organelle (GO:0098588)                                | 1.77 | 1.67E-02 |
| endoplasmic reticulum (GO:0005783)                                         | 1.74 | 3.27E-02 |
| extracellular region part (GO:0044421)                                     | 1.71 | 2.58E-04 |
| extracellular region (GO:0005576)                                          | 1.7  | 1.15E-04 |
| organelle membrane (GO:0031090)                                            | 1.6  | 1.98E-02 |
| vesicle (GO:0031982)                                                       | 1.55 | 6.15E-03 |
| extracellular vesicle (GO:1903561)                                         | 1.54 | 1.55E-02 |
| extracellular organelle (GO:0043230)                                       | 1.53 | 1.56E-02 |
| plasma membrane part (GO:0044459)                                          | 1.53 | 2.57E-02 |
| extracellular exosome (GO:0070062)                                         | 1.49 | 2.42E-02 |
| membrane-bounded vesicle (GO:0031988)                                      | 1.46 | 1.89E-02 |



|                                                       |       |          |
|-------------------------------------------------------|-------|----------|
| cytoplasm (GO:0005737)                                | 1.33  | 8.51E-04 |
| membrane-bounded organelle (GO:0043227)               | 1.31  | 3.27E-04 |
| intracellular membrane-bounded organelle (GO:0043231) | 1.29  | 1.69E-03 |
| nucleus (GO:0005634)                                  | 1.28  | 2.18E-02 |
| organelle (GO:0043226)                                | 1.25  | 1.14E-03 |
| cytoplasmic part (GO:0044444)                         | 1.24  | 4.09E-02 |
| intracellular organelle (GO:0043229)                  | 1.24  | 4.49E-03 |
| intracellular part (GO:0044424)                       | 1.18  | 1.06E-02 |
| intracellular (GO:0005622)                            | 1.17  | 8.69E-03 |
| cellular_component (GO:0005575)                       | 1.11  | 5.92E-03 |
| Unclassified (UNCLASSIFIED)                           | 0.71  | 5.92E-03 |
| neuron part (GO:0097458)                              | < 0.2 | 1.74E-02 |

(c)

**Supplementary Table S6. Pathway analysis for DEGs.**

| <b>Pathway ID</b> | <b>Pathway</b>                        | <b>DEGs with pathway annotation</b> | <b>All genes with pathway annotation</b> | <b>Pvalue</b> | <b>Qvalue</b> |
|-------------------|---------------------------------------|-------------------------------------|------------------------------------------|---------------|---------------|
| ko05162           | Measles                               | 17 (8.37%)                          | 343 (1.78%)                              | 1.41E-07      | 1.76E-05      |
| ko05160           | Hepatitis C                           | 14 (6.9%)                           | 237 (1.23%)                              | 2.26E-07      | 1.76E-05      |
| ko04622           | RIG-I-like receptor signaling pathway | 9 (4.43%)                           | 132 (0.68%)                              | 1.09E-05      | 5.68E-04      |
| ko04142           | Lysosome                              | 10 (4.93%)                          | 210 (1.09%)                              | 7.91E-05      | 3.08E-03      |
| ko05323           | Rheumatoid arthritis                  | 9 (4.43%)                           | 176 (0.91%)                              | 0.000105086   | 3.28E-03      |
| ko04120           | Ubiquitin mediated proteolysis        | 10 (4.93%)                          | 251 (1.3%)                               | 0.000336585   | 8.75E-03      |
| ko04621           | NOD-like receptor signaling pathway   | 7 (3.45%)                           | 135 (0.7%)                               | 0.000569626   | 1.27E-02      |

|         |                                                            |            |              |             |          |
|---------|------------------------------------------------------------|------------|--------------|-------------|----------|
| ko04612 | Antigen processing and presentation                        | 8 (3.94%)  | 200 (1.04%)  | 0.001283502 | 2.50E-02 |
| ko04623 | Cytosolic DNA-sensing pathway                              | 6 (2.96%)  | 131 (0.68%)  | 0.002640554 | 4.58E-02 |
| ko04062 | Chemokine signaling pathway                                | 11 (5.42%) | 393 (2.04%)  | 0.00305503  | 4.77E-02 |
| ko04620 | Toll-like receptor signaling pathway                       | 7 (3.45%)  | 186 (0.96%)  | 0.00358754  | 5.09E-02 |
| ko05200 | Pathways in cancer                                         | 16 (7.88%) | 720 (3.73%)  | 0.004001136 | 5.20E-02 |
| ko05120 | Epithelial cell signaling in Helicobacter pylori infection | 5 (2.46%)  | 108 (0.56%)  | 0.005684931 | 6.82E-02 |
| ko04060 | Cytokine-cytokine receptor interaction                     | 10 (4.93%) | 381 (1.97%)  | 0.007228815 | 8.05E-02 |
| ko05215 | Prostate cancer                                            | 6 (2.96%)  | 170 (0.88%)  | 0.009272729 | 9.64E-02 |
| ko05222 | Small cell lung cancer                                     | 6 (2.96%)  | 213 (1.1%)   | 0.02534562  | 2.24E-01 |
| ko04115 | p53 signaling pathway                                      | 5 (2.46%)  | 161 (0.83%)  | 0.02777991  | 2.24E-01 |
| ko05142 | Chagas disease (American trypanosomiasis)                  | 6 (2.96%)  | 219 (1.13%)  | 0.02851735  | 2.24E-01 |
| ko04510 | Focal adhesion                                             | 19 (9.36%) | 1138 (5.89%) | 0.03127463  | 2.24E-01 |
| ko04978 | Mineral absorption                                         | 4 (1.97%)  | 113 (0.59%)  | 0.03146964  | 2.24E-01 |
| ko04380 | Osteoclast differentiation                                 | 6 (2.96%)  | 227 (1.18%)  | 0.03313876  | 2.24E-01 |
| ko05330 | Allograft rejection                                        | 4 (1.97%)  | 116 (0.6%)   | 0.03416949  | 2.24E-01 |
| ko04662 | B cell receptor signaling pathway                          | 5 (2.46%)  | 173 (0.9%)   | 0.03620516  | 2.24E-01 |
| ko05332 | Graft-versus-host disease                                  | 4 (1.97%)  | 119 (0.62%)  | 0.03700024  | 2.24E-01 |
| ko00100 | Steroid biosynthesis                                       | 2 (0.99%)  | 29 (0.15%)   | 0.037074    | 2.24E-01 |
| ko05218 | Melanoma                                                   | 4 (1.97%)  | 120 (0.62%)  | 0.03797298  | 2.24E-01 |
| ko04940 | Type I diabetes mellitus                                   | 4 (1.97%)  | 121 (0.63%)  | 0.03896032  | 2.24E-01 |
| ko04610 | Complement and coagulation cascades                        | 5 (2.46%)  | 178 (0.92%)  | 0.04013292  | 2.24E-01 |
| ko00480 | Glutathione metabolism                                     | 3 (1.48%)  | 76 (0.39%)   | 0.04602105  | 2.47E-01 |
| ko04650 | Natural killer cell mediated cytotoxicity                  | 6 (2.96%)  | 248 (1.28%)  | 0.04749406  | 2.47E-01 |
| ko05012 | Parkinson's disease                                        | 5 (2.46%)  | 196 (1.02%)  | 0.05635147  | 2.70E-01 |
| ko00280 | Valine, leucine and isoleucine degradation                 | 3 (1.48%)  | 83 (0.43%)   | 0.05707608  | 2.70E-01 |

|         |                                               |           |             |            |          |
|---------|-----------------------------------------------|-----------|-------------|------------|----------|
| ko05214 | Glioma                                        | 4 (1.97%) | 138 (0.71%) | 0.05797451 | 2.70E-01 |
| ko05219 | Bladder cancer                                | 3 (1.48%) | 84 (0.44%)  | 0.05874931 | 2.70E-01 |
| ko00030 | Pentose phosphate pathway                     | 2 (0.99%) | 42 (0.22%)  | 0.07200163 | 3.14E-01 |
| ko03320 | PPAR signaling pathway                        | 4 (1.97%) | 149 (0.77%) | 0.0724898  | 3.14E-01 |
| ko04110 | Cell cycle                                    | 5 (2.46%) | 218 (1.13%) | 0.0806111  | 3.32E-01 |
| ko05130 | Pathogenic Escherichia coli infection         | 6 (2.96%) | 285 (1.48%) | 0.08096093 | 3.32E-01 |
| ko04144 | Endocytosis                                   | 9 (4.43%) | 501 (2.59%) | 0.08309833 | 3.32E-01 |
| ko04145 | Phagosome                                     | 7 (3.45%) | 359 (1.86%) | 0.08547158 | 3.33E-01 |
| ko00630 | Glyoxylate and dicarboxylate metabolism       | 2 (0.99%) | 47 (0.24%)  | 0.0874161  | 3.33E-01 |
| ko05213 | Endometrial cancer                            | 3 (1.48%) | 102 (0.53%) | 0.09261076 | 3.44E-01 |
| ko05320 | Autoimmune thyroid disease                    | 4 (1.97%) | 166 (0.86%) | 0.09817875 | 3.56E-01 |
| ko04512 | ECM-receptor interaction                      | 13 (6.4%) | 841 (4.36%) | 0.1069662  | 3.79E-01 |
| ko05131 | Shigellosis                                   | 5 (2.46%) | 247 (1.28%) | 0.1197637  | 4.15E-01 |
| ko04966 | Collecting duct acid secretion                | 2 (0.99%) | 58 (0.3%)   | 0.124227   | 4.17E-01 |
| ko05140 | Leishmaniasis                                 | 3 (1.48%) | 117 (0.61%) | 0.125649   | 4.17E-01 |
| ko05145 | Toxoplasmosis                                 | 5 (2.46%) | 253 (1.31%) | 0.128815   | 4.19E-01 |
| ko05143 | African trypanosomiasis                       | 2 (0.99%) | 62 (0.32%)  | 0.1384028  | 4.41E-01 |
| ko05216 | Thyroid cancer                                | 2 (0.99%) | 63 (0.33%)  | 0.1420005  | 4.41E-01 |
| ko04141 | Protein processing in endoplasmic reticulum   | 6 (2.96%) | 341 (1.77%) | 0.1510239  | 4.41E-01 |
| ko00380 | Tryptophan metabolism                         | 2 (0.99%) | 66 (0.34%)  | 0.1529096  | 4.41E-01 |
| ko00020 | Citrate cycle (TCA cycle)                     | 2 (0.99%) | 66 (0.34%)  | 0.1529096  | 4.41E-01 |
| ko00790 | Folate biosynthesis                           | 1 (0.49%) | 16 (0.08%)  | 0.1556257  | 4.41E-01 |
| ko00072 | Synthesis and degradation of ketone bodies    | 1 (0.49%) | 16 (0.08%)  | 0.1556257  | 4.41E-01 |
| ko00603 | Glycosphingolipid biosynthesis - globo series | 1 (0.49%) | 17 (0.09%)  | 0.1645097  | 4.58E-01 |
| ko05020 | Prion diseases                                | 3 (1.48%) | 134 (0.69%) | 0.1673345  | 4.58E-01 |
| ko04010 | MAPK signaling pathway                        | 8 (3.94%) | 514 (2.66%) | 0.1751208  | 4.71E-01 |

|         |                                                 |            |             |           |          |
|---------|-------------------------------------------------|------------|-------------|-----------|----------|
| ko04810 | Regulation of actin cytoskeleton                | 11 (5.42%) | 771 (3.99%) | 0.1896771 | 4.96E-01 |
| ko04711 | Circadian rhythm - fly                          | 1 (0.49%)  | 20 (0.1%)   | 0.1906075 | 4.96E-01 |
| ko04670 | Leukocyte transendothelial migration            | 5 (2.46%)  | 294 (1.52%) | 0.1981405 | 5.07E-01 |
| ko00604 | Glycosphingolipid biosynthesis - ganglio series | 1 (0.49%)  | 24 (0.12%)  | 0.2241469 | 5.55E-01 |
| ko00450 | Selenocompound metabolism                       | 1 (0.49%)  | 24 (0.12%)  | 0.2241469 | 5.55E-01 |
| ko00330 | Arginine and proline metabolism                 | 2 (0.99%)  | 88 (0.46%)  | 0.2364979 | 5.57E-01 |
| ko04640 | Hematopoietic cell lineage                      | 3 (1.48%)  | 160 (0.83%) | 0.2372311 | 5.57E-01 |
| ko05110 | Vibrio cholerae infection                       | 5 (2.46%)  | 315 (1.63%) | 0.2377764 | 5.57E-01 |
| ko00670 | One carbon pool by folate                       | 1 (0.49%)  | 27 (0.14%)  | 0.2483905 | 5.57E-01 |
| ko04614 | Renin-angiotensin system                        | 1 (0.49%)  | 27 (0.14%)  | 0.2483905 | 5.57E-01 |
| ko00511 | Other glycan degradation                        | 1 (0.49%)  | 28 (0.15%)  | 0.256303  | 5.57E-01 |
| ko04012 | ErbB signaling pathway                          | 3 (1.48%)  | 167 (0.86%) | 0.2568798 | 5.57E-01 |
| ko04350 | TGF-beta signaling pathway                      | 3 (1.48%)  | 168 (0.87%) | 0.2597058 | 5.57E-01 |
| ko05340 | Primary immunodeficiency                        | 2 (0.99%)  | 94 (0.49%)  | 0.2598502 | 5.57E-01 |
| ko00531 | Glycosaminoglycan degradation                   | 1 (0.49%)  | 29 (0.15%)  | 0.2641326 | 5.57E-01 |
| ko00900 | Terpenoid backbone biosynthesis                 | 1 (0.49%)  | 29 (0.15%)  | 0.2641326 | 5.57E-01 |
| ko05416 | Viral myocarditis                               | 6 (2.96%)  | 416 (2.15%) | 0.2738435 | 5.70E-01 |
| ko02010 | ABC transporters                                | 2 (0.99%)  | 99 (0.51%)  | 0.2793345 | 5.73E-01 |
| ko05310 | Asthma                                          | 2 (0.99%)  | 102 (0.53%) | 0.2910113 | 5.75E-01 |
| ko00190 | Oxidative phosphorylation                       | 3 (1.48%)  | 179 (0.93%) | 0.2910244 | 5.75E-01 |
| ko03060 | Protein export                                  | 1 (0.49%)  | 33 (0.17%)  | 0.2946393 | 5.75E-01 |
| ko04950 | Maturity onset diabetes of the young            | 1 (0.49%)  | 33 (0.17%)  | 0.2946393 | 5.75E-01 |
| ko01040 | Biosynthesis of unsaturated fatty acids         | 1 (0.49%)  | 35 (0.18%)  | 0.3094173 | 5.96E-01 |
| ko00360 | Phenylalanine metabolism                        | 1 (0.49%)  | 36 (0.19%)  | 0.3166904 | 6.02E-01 |
| ko05221 | Acute myeloid leukemia                          | 2 (0.99%)  | 110 (0.57%) | 0.3220092 | 6.05E-01 |
| ko05100 | Bacterial invasion of epithelial cells          | 4 (1.97%)  | 282 (1.46%) | 0.3447081 | 6.19E-01 |

|         |                                             |            |              |           |          |
|---------|---------------------------------------------|------------|--------------|-----------|----------|
| ko00340 | Histidine metabolism                        | 1 (0.49%)  | 40 (0.21%)   | 0.3450283 | 6.19E-01 |
| ko00250 | Alanine, aspartate and glutamate metabolism | 1 (0.49%)  | 40 (0.21%)   | 0.3450283 | 6.19E-01 |
| ko05210 | Colorectal cancer                           | 2 (0.99%)  | 116 (0.6%)   | 0.3450423 | 6.19E-01 |
| ko05217 | Basal cell carcinoma                        | 2 (0.99%)  | 119 (0.62%)  | 0.3564664 | 6.32E-01 |
| ko04514 | Cell adhesion molecules (CAMs)              | 4 (1.97%)  | 292 (1.51%)  | 0.3685591 | 6.36E-01 |
| ko04520 | Adherens junction                           | 4 (1.97%)  | 292 (1.51%)  | 0.3685591 | 6.36E-01 |
| ko04722 | Neurotrophin signaling pathway              | 4 (1.97%)  | 293 (1.52%)  | 0.3709431 | 6.36E-01 |
| ko05146 | Amoebiasis                                  | 12 (5.91%) | 1012 (5.24%) | 0.3762386 | 6.38E-01 |
| ko04310 | Wnt signaling pathway                       | 4 (1.97%)  | 300 (1.55%)  | 0.3876114 | 6.50E-01 |
| ko00410 | beta-Alanine metabolism                     | 1 (0.49%)  | 47 (0.24%)   | 0.3918341 | 6.50E-01 |
| ko05212 | Pancreatic cancer                           | 2 (0.99%)  | 131 (0.68%)  | 0.4013849 | 6.57E-01 |
| ko00650 | Butanoate metabolism                        | 1 (0.49%)  | 49 (0.25%)   | 0.404585  | 6.57E-01 |
| ko05322 | Systemic lupus erythematosus                | 3 (1.48%)  | 231 (1.2%)   | 0.4389462 | 7.06E-01 |
| ko00350 | Tyrosine metabolism                         | 1 (0.49%)  | 57 (0.3%)    | 0.4529828 | 7.21E-01 |
| ko05220 | Chronic myeloid leukemia                    | 2 (0.99%)  | 149 (0.77%)  | 0.4658311 | 7.26E-01 |
| ko00270 | Cysteine and methionine metabolism          | 1 (0.49%)  | 60 (0.31%)   | 0.4701048 | 7.26E-01 |
| ko00051 | Fructose and mannose metabolism             | 1 (0.49%)  | 60 (0.31%)   | 0.4701048 | 7.26E-01 |
| ko05144 | Malaria                                     | 2 (0.99%)  | 155 (0.8%)   | 0.4863988 | 7.44E-01 |
| ko04540 | Gap junction                                | 2 (0.99%)  | 160 (0.83%)  | 0.5031599 | 7.57E-01 |
| ko01100 | Metabolic pathways                          | 19 (9.36%) | 1778 (9.21%) | 0.5056    | 7.57E-01 |
| ko00860 | Porphyrin and chlorophyll metabolism        | 1 (0.49%)  | 69 (0.36%)   | 0.5183363 | 7.57E-01 |
| ko00140 | Steroid hormone biosynthesis                | 1 (0.49%)  | 69 (0.36%)   | 0.5183363 | 7.57E-01 |
| ko04630 | Jak-STAT signaling pathway                  | 3 (1.48%)  | 261 (1.35%)  | 0.5192132 | 7.57E-01 |
| ko00520 | Amino sugar and nucleotide sugar metabolism | 1 (0.49%)  | 72 (0.37%)   | 0.533422  | 7.70E-01 |
| ko04977 | Vitamin digestion and absorption            | 1 (0.49%)  | 74 (0.38%)   | 0.543217  | 7.76E-01 |
| ko04260 | Cardiac muscle contraction                  | 3 (1.48%)  | 272 (1.41%)  | 0.5470793 | 7.76E-01 |

|         |                                                           |           |             |           |          |
|---------|-----------------------------------------------------------|-----------|-------------|-----------|----------|
| ko05150 | Staphylococcus aureus infection                           | 2 (0.99%) | 178 (0.92%) | 0.5605084 | 7.88E-01 |
| ko04960 | Aldosterone-regulated sodium reabsorption                 | 1 (0.49%) | 79 (0.41%)  | 0.5668185 | 7.88E-01 |
| ko04962 | Vasopressin-regulated water reabsorption                  | 1 (0.49%) | 80 (0.41%)  | 0.5713911 | 7.88E-01 |
| ko00510 | N-Glycan biosynthesis                                     | 1 (0.49%) | 81 (0.42%)  | 0.5759156 | 7.88E-01 |
| ko04974 | Protein digestion and absorption                          | 8 (3.94%) | 787 (4.08%) | 0.588984  | 7.94E-01 |
| ko05412 | Arrhythmogenic right ventricular cardiomyopathy<br>(ARVC) | 2 (0.99%) | 188 (0.97%) | 0.5902786 | 7.94E-01 |
| ko04972 | Pancreatic secretion                                      | 2 (0.99%) | 196 (1.02%) | 0.6130025 | 8.13E-01 |
| ko00970 | Aminoacyl-tRNA biosynthesis                               | 1 (0.49%) | 91 (0.47%)  | 0.6186275 | 8.13E-01 |
| ko04340 | Hedgehog signaling pathway                                | 1 (0.49%) | 93 (0.48%)  | 0.6266417 | 8.13E-01 |
| ko05223 | Non-small cell lung cancer                                | 1 (0.49%) | 95 (0.49%)  | 0.6344882 | 8.13E-01 |
| ko04973 | Carbohydrate digestion and absorption                     | 1 (0.49%) | 95 (0.49%)  | 0.6344882 | 8.13E-01 |
| ko04970 | Salivary secretion                                        | 4 (1.97%) | 414 (2.14%) | 0.6360182 | 8.13E-01 |
| ko04916 | Melanogenesis                                             | 2 (0.99%) | 207 (1.07%) | 0.642665  | 8.15E-01 |
| ko04530 | Tight junction                                            | 4 (1.97%) | 432 (2.24%) | 0.6689051 | 8.42E-01 |
| ko04330 | Notch signaling pathway                                   | 1 (0.49%) | 111 (0.57%) | 0.6916307 | 8.63E-01 |
| ko00562 | Inositol phosphate metabolism                             | 1 (0.49%) | 116 (0.6%)  | 0.7075939 | 8.73E-01 |
| ko04672 | Intestinal immune network for IgA production              | 1 (0.49%) | 117 (0.61%) | 0.7106864 | 8.73E-01 |
| ko03040 | Spliceosome                                               | 3 (1.48%) | 352 (1.82%) | 0.7188033 | 8.76E-01 |
| ko05211 | Renal cell carcinoma                                      | 1 (0.49%) | 122 (0.63%) | 0.7256677 | 8.78E-01 |
| ko05410 | Hypertrophic cardiomyopathy (HCM)                         | 3 (1.48%) | 369 (1.91%) | 0.7480053 | 8.93E-01 |
| ko05414 | Dilated cardiomyopathy                                    | 3 (1.48%) | 370 (1.92%) | 0.7496455 | 8.93E-01 |
| ko00564 | Glycerophospholipid metabolism                            | 1 (0.49%) | 135 (0.7%)  | 0.7611036 | 8.95E-01 |
| ko04660 | T cell receptor signaling pathway                         | 2 (0.99%) | 262 (1.36%) | 0.7647435 | 8.95E-01 |
| ko04320 | Dorso-ventral axis formation                              | 1 (0.49%) | 138 (0.71%) | 0.7686113 | 8.95E-01 |
| ko04370 | VEGF signaling pathway                                    | 1 (0.49%) | 144 (0.75%) | 0.7829296 | 9.05E-01 |

|         |                                         |           |             |           |          |
|---------|-----------------------------------------|-----------|-------------|-----------|----------|
| ko03015 | mRNA surveillance pathway               | 3 (1.48%) | 397 (2.06%) | 0.7907879 | 9.06E-01 |
| ko04664 | Fc epsilon RI signaling pathway         | 1 (0.49%) | 151 (0.78%) | 0.7985235 | 9.06E-01 |
| ko04976 | Bile secretion                          | 1 (0.49%) | 154 (0.8%)  | 0.8048605 | 9.06E-01 |
| ko04210 | Apoptosis                               | 1 (0.49%) | 157 (0.81%) | 0.810999  | 9.06E-01 |
| ko04910 | Insulin signaling pathway               | 2 (0.99%) | 291 (1.51%) | 0.8133092 | 9.06E-01 |
| ko04666 | Fc gamma R-mediated phagocytosis        | 2 (0.99%) | 307 (1.59%) | 0.8361095 | 9.13E-01 |
| ko05016 | Huntington's disease                    | 3 (1.48%) | 438 (2.27%) | 0.8424462 | 9.13E-01 |
| ko05010 | Alzheimer's disease                     | 2 (0.99%) | 313 (1.62%) | 0.8439933 | 9.13E-01 |
| ko00310 | Lysine degradation                      | 1 (0.49%) | 177 (0.92%) | 0.8472906 | 9.13E-01 |
| ko00240 | Pyrimidine metabolism                   | 1 (0.49%) | 178 (0.92%) | 0.8489108 | 9.13E-01 |
| ko05014 | Amyotrophic lateral sclerosis (ALS)     | 1 (0.49%) | 187 (0.97%) | 0.8627443 | 9.22E-01 |
| ko04070 | Phosphatidylinositol signaling system   | 1 (0.49%) | 198 (1.03%) | 0.8779513 | 9.31E-01 |
| ko04360 | Axon guidance                           | 2 (0.99%) | 348 (1.8%)  | 0.8835122 | 9.31E-01 |
| ko04912 | GnRH signaling pathway                  | 1 (0.49%) | 213 (1.1%)  | 0.8960214 | 9.38E-01 |
| ko04114 | Oocyte meiosis                          | 1 (0.49%) | 221 (1.14%) | 0.9045432 | 9.41E-01 |
| ko04971 | Gastric acid secretion                  | 1 (0.49%) | 238 (1.23%) | 0.9204135 | 9.51E-01 |
| ko03013 | RNA transport                           | 3 (1.48%) | 557 (2.88%) | 0.9349765 | 9.56E-01 |
| ko04020 | Calcium signaling pathway               | 2 (0.99%) | 420 (2.18%) | 0.937452  | 9.56E-01 |
| ko03010 | Ribosome                                | 1 (0.49%) | 281 (1.46%) | 0.949791  | 9.62E-01 |
| ko04270 | Vascular smooth muscle contraction      | 2 (0.99%) | 465 (2.41%) | 0.9580951 | 9.64E-01 |
| ko04080 | Neuroactive ligand-receptor interaction | 1 (0.49%) | 359 (1.86%) | 0.9782868 | 9.78E-01 |

---
